# Supplementary material
Source: MDPI journal article supplement (https://www.mdpi.com/search?q=marinedrugs-17-00099)

# Cryptic Secondary Metabolites from the Sponge-Associated Fungus *Aspergillus ochraceus*

**Marian Frank**<sup>1</sup>, **Ferhat Can Özkaya**<sup>2</sup>, **Werner E. G. Müller**<sup>3</sup>, **Alexandra Hamacher**<sup>4</sup>,  
**Matthias U. Kassack**<sup>4</sup>, **Wenhan Lin**<sup>5</sup>, **Zhen Liu**<sup>1,\*</sup> and **Peter Proksch**<sup>1,\*</sup>

<sup>1</sup> Institute of Pharmaceutical Biology and Biotechnology, Heinrich-Heine-Universität Düsseldorf, 40225 Düsseldorf, Germany; marian.frank@hhu.de (M.F.)

<sup>2</sup> Faculty of Fisheries, İzmir Katip Çelebi University, Çiğli, 35620 İzmir, Turkey; fcanozkaya@gmail.com (F.C.Ö.)

<sup>3</sup> Institute of Physiological Chemistry, Universitätsmedizin der Johannes Gutenberg-Universität Mainz, 55128 Mainz, Germany; wmueller@uni-mainz.de (W.E.G.M.)

<sup>4</sup> Institute of Pharmaceutical and Medicinal Chemistry, Heinrich-Heine-Universität Düsseldorf, 40225 Düsseldorf, Germany; alexandra.hamacher@hhu.de (A.H.); matthias.kassack@hhu.de (M.U.K.)

<sup>5</sup> State Key Laboratory of Natural and Biomimetic Drugs, Peking University, Beijing 100191, People's Republic of China; whlin@bjmu.edu.cn (W.L.)

\* Correspondence: zhenfeizi0@sina.com (Z.L.); proksch@uni-duesseldorf (P.P.); Tel.: +49-211-81-14163

## Table of Content

|                                                                                                            |    |
|------------------------------------------------------------------------------------------------------------|----|
| Figure S1. UV spectrum of compound <b>1</b> .....                                                          | 3  |
| Figure S2. HRESIMS of compound <b>1</b> .....                                                              | 3  |
| Figure S3. <sup>1</sup> H NMR (600 MHz, DMSO- <i>d</i> <sub>6</sub> ) spectrum of compound <b>1</b> .....  | 4  |
| Figure S4. <sup>13</sup> C NMR (125 MHz, DMSO- <i>d</i> <sub>6</sub> ) spectrum of compound <b>1</b> ..... | 5  |
| Figure S5. COSY (600MHz, DMSO- <i>d</i> <sub>6</sub> ) spectrum of compound <b>1</b> .....                 | 6  |
| Figure S6. HSQC (600MHz/150 MHz, DMSO- <i>d</i> <sub>6</sub> ) spectrum of compound <b>1</b> .....         | 7  |
| Figure S7. HMBC (600MHz/150 MHz, DMSO- <i>d</i> <sub>6</sub> ) spectrum of compound <b>1</b> .....         | 8  |
| Figure S8. ROESY (600MHz, DMSO- <i>d</i> <sub>6</sub> ) spectrum of compound <b>1</b> .....                | 9  |
| Figure S9. UV spectrum of compound <b>2</b> .....                                                          | 10 |
| Figure S10. HRESIMS of compound <b>2</b> .....                                                             | 10 |
| Figure S11. <sup>1</sup> H NMR (600 MHz, MeOH- <i>d</i> <sub>4</sub> ) spectrum of compound <b>2</b> ..... | 11 |
| Figure S12. COSY (600 MHz, MeOH- <i>d</i> <sub>4</sub> ) spectrum of compound <b>2</b> .....               | 12 |
| Figure S13. HSQC (600MHz/150 MHz, MeOH- <i>d</i> <sub>4</sub> ) spectrum of compound <b>2</b> .....        | 13 |
| Figure S14. HMBC (600MHz/150 MHz, MeOH- <i>d</i> <sub>4</sub> ) spectrum of compound <b>2</b> .....        | 14 |
| Figure S15. UV spectrum of compound <b>3</b> .....                                                         | 15 |
| Figure S16. HRESIMS of compound <b>3</b> .....                                                             | 15 |
| Figure S17. <sup>1</sup> H NMR (600 MHz, MeOH- <i>d</i> <sub>4</sub> ) spectrum of compound <b>3</b> ..... | 16 |
| Figure S18. COSY (600 MHz, MeOH- <i>d</i> <sub>4</sub> ) spectrum of compound <b>3</b> .....               | 17 |
| Figure S19. HSQC (600MHz/150 MHz, MeOH- <i>d</i> <sub>4</sub> ) spectrum of compound <b>3</b> .....        | 18 |
| Figure S20. HMBC (600MHz/150 MHz, MeOH- <i>d</i> <sub>4</sub> ) spectrum of compound <b>3</b> .....        | 19 |
| Figure S21. Chromatogram of C <sub>4</sub> -Marfey's L-FDAA adduct of compound <b>1</b> .....              | 20 |
| Figure S22. Chromatogram of C <sub>4</sub> -Marfey's D-FDAA adduct of compound <b>1</b> .....              | 21 |

Figure S1. UV spectrum of compound 1.

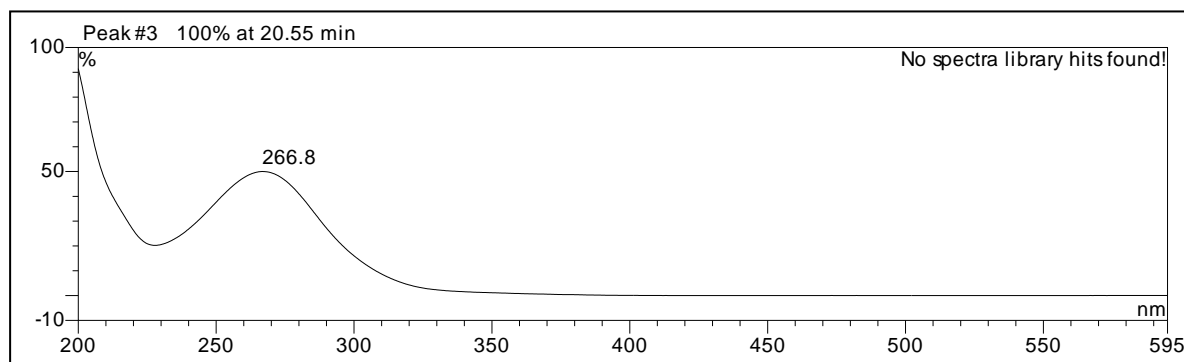

Figure S2. HRESIMS of compound 1.

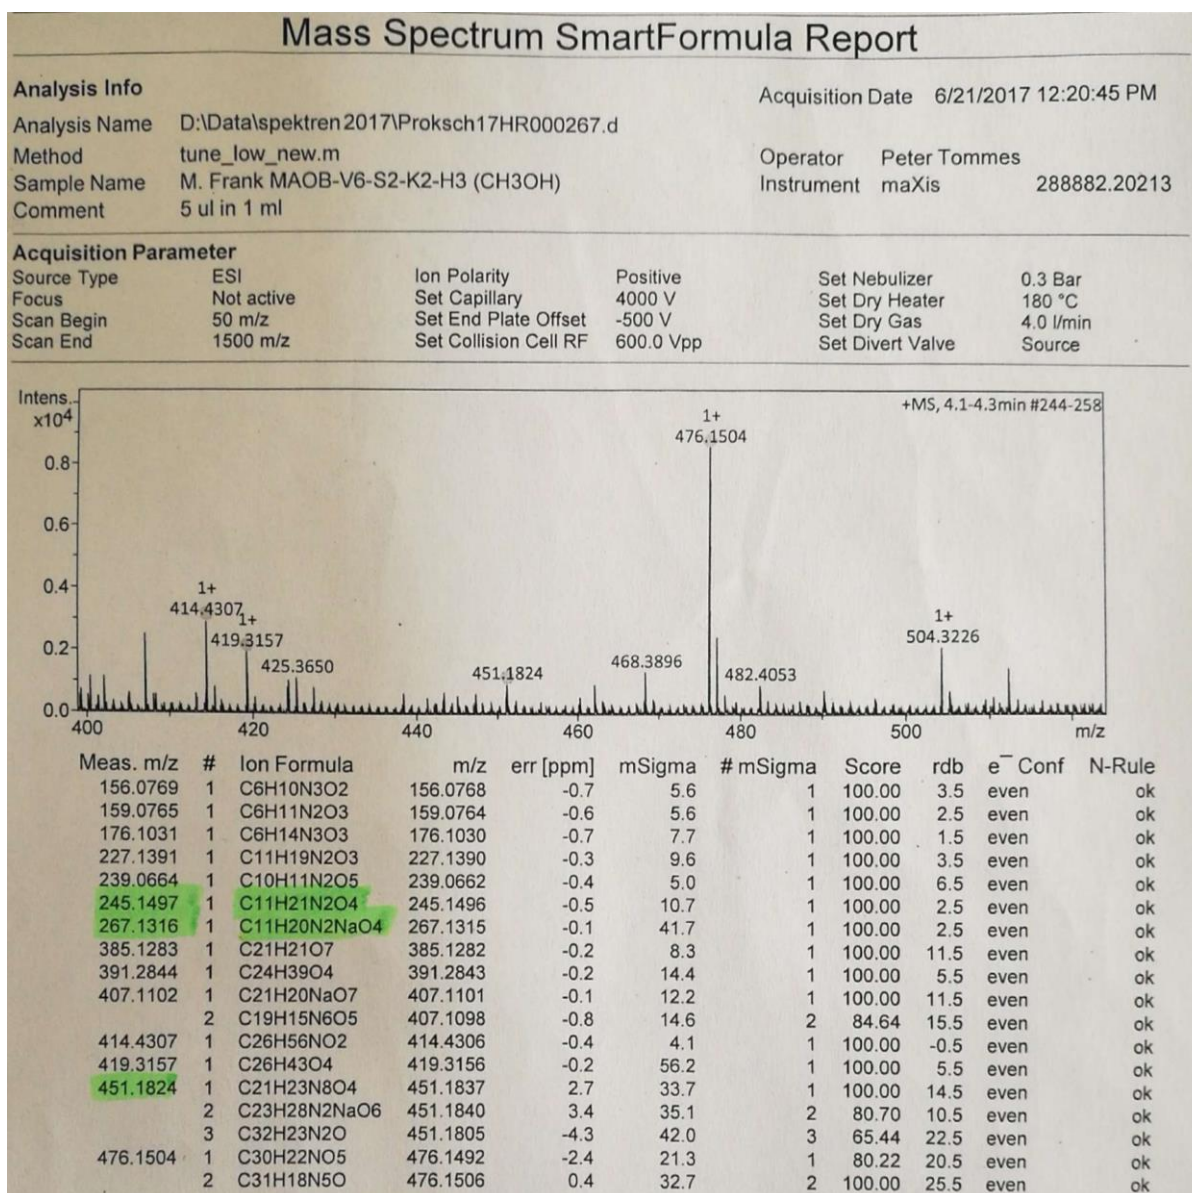

Figure S3.  $^1\text{H}$ NMR (600 MHz,  $\text{DMSO-}d_6$ ) spectrum of compound **1**.

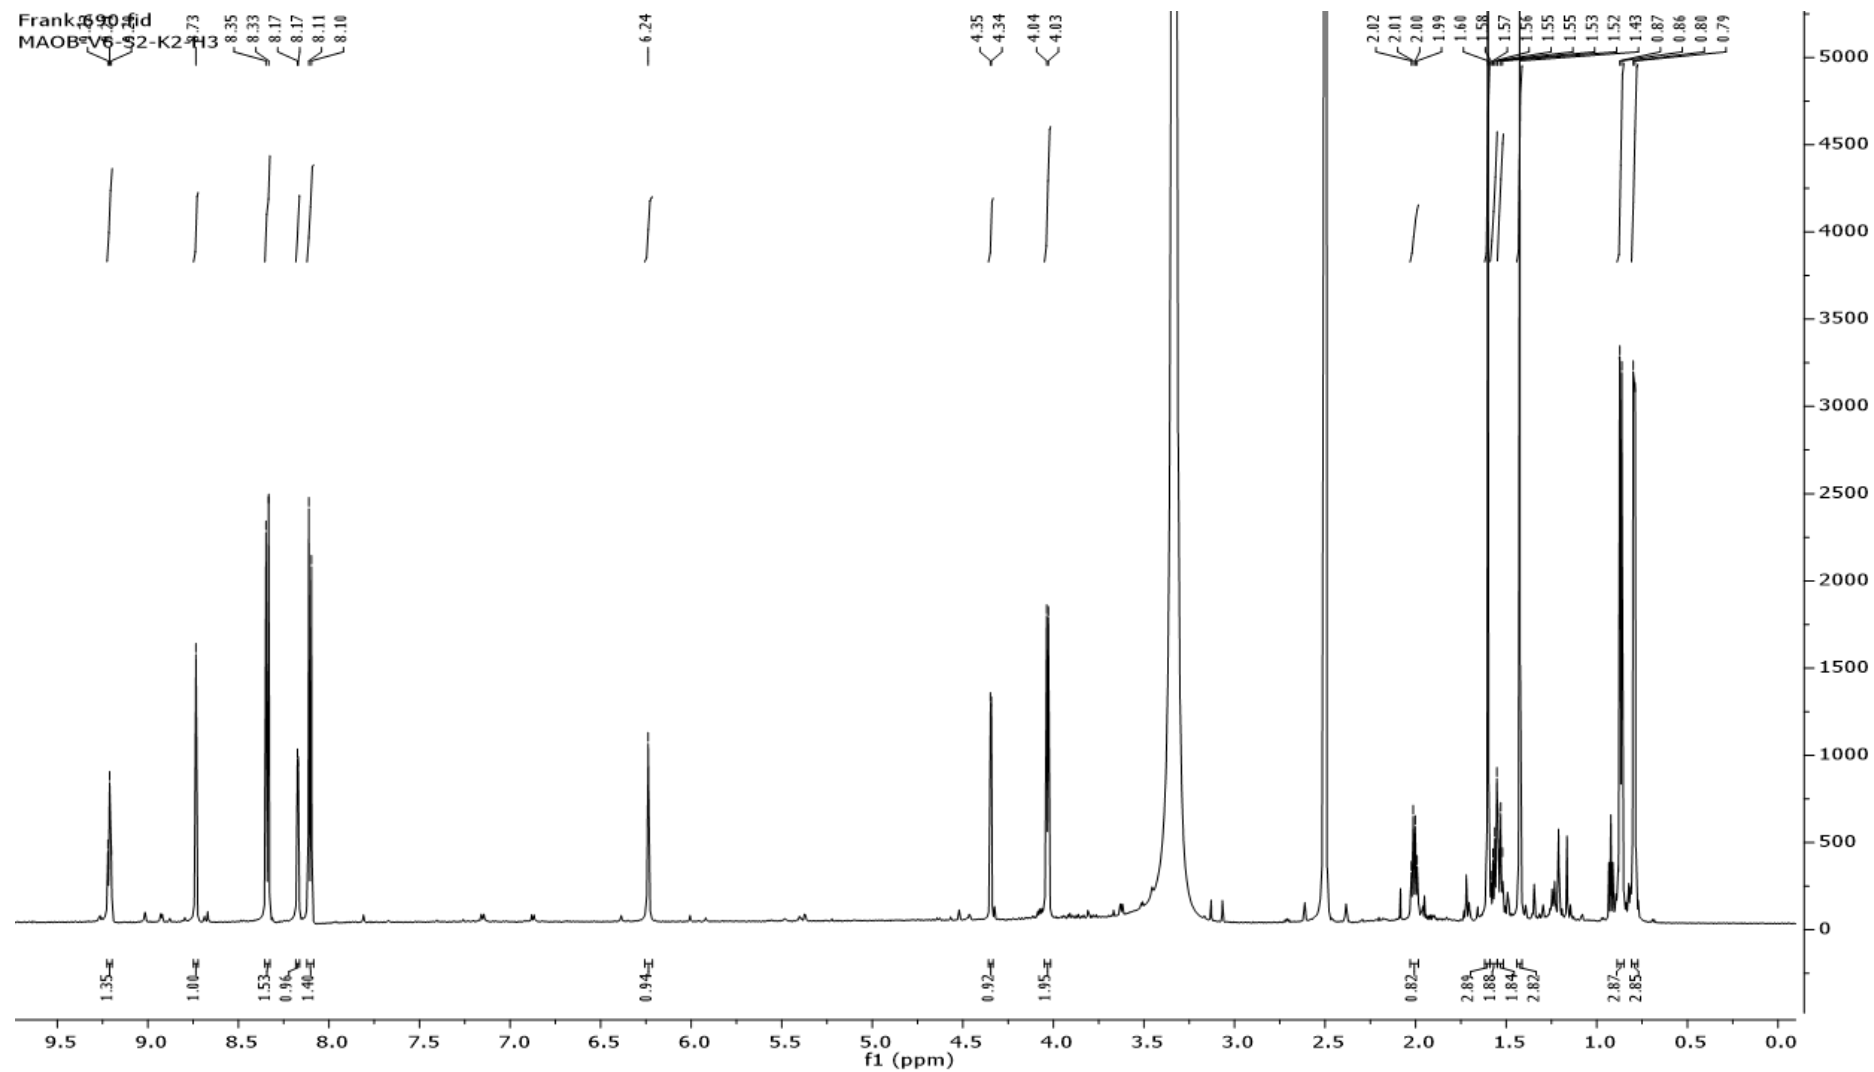

Figure S4.  $^{13}\text{C}$  NMR (125 MHz,  $\text{DMSO-}d_6$ ) spectrum of compound **1**.

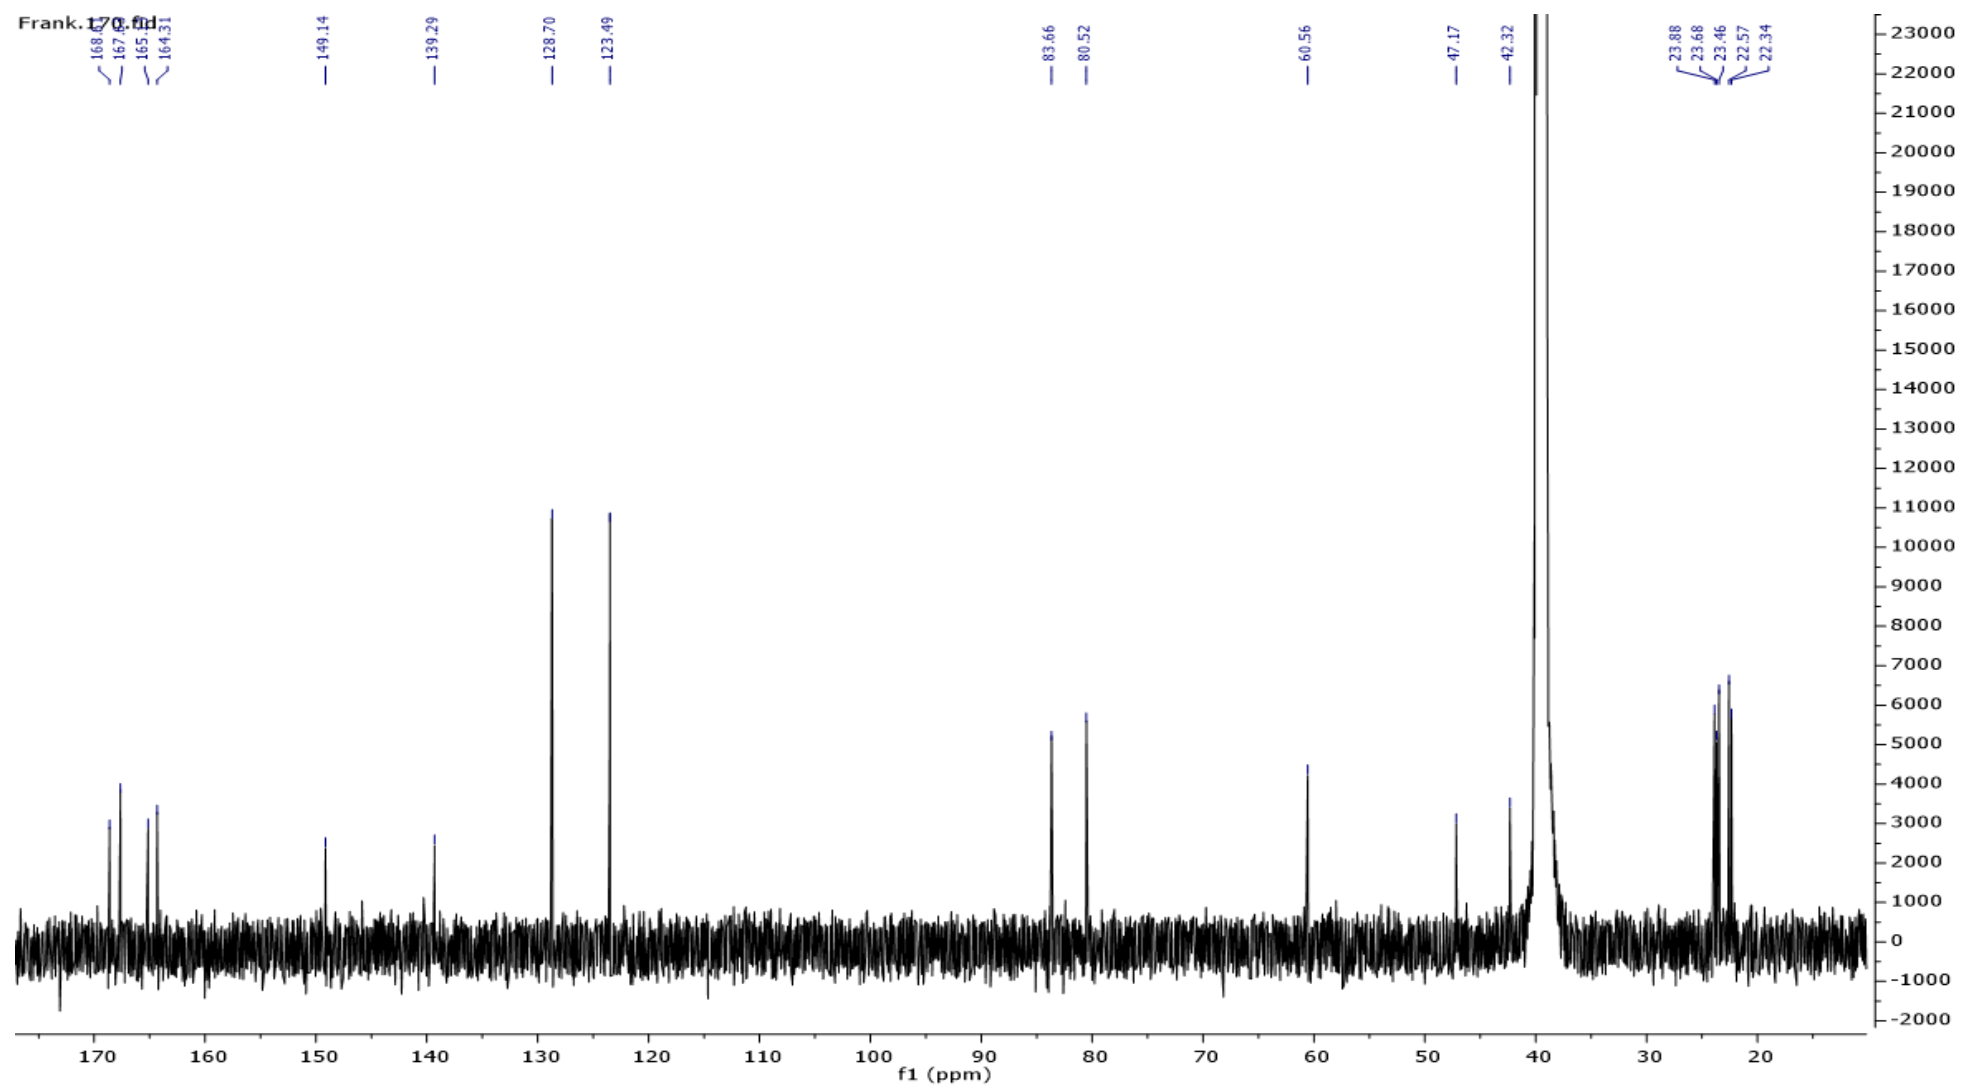

Figure S5. COSY (600MHz, DMSO- $d_6$ ) spectrum of compound **1**.

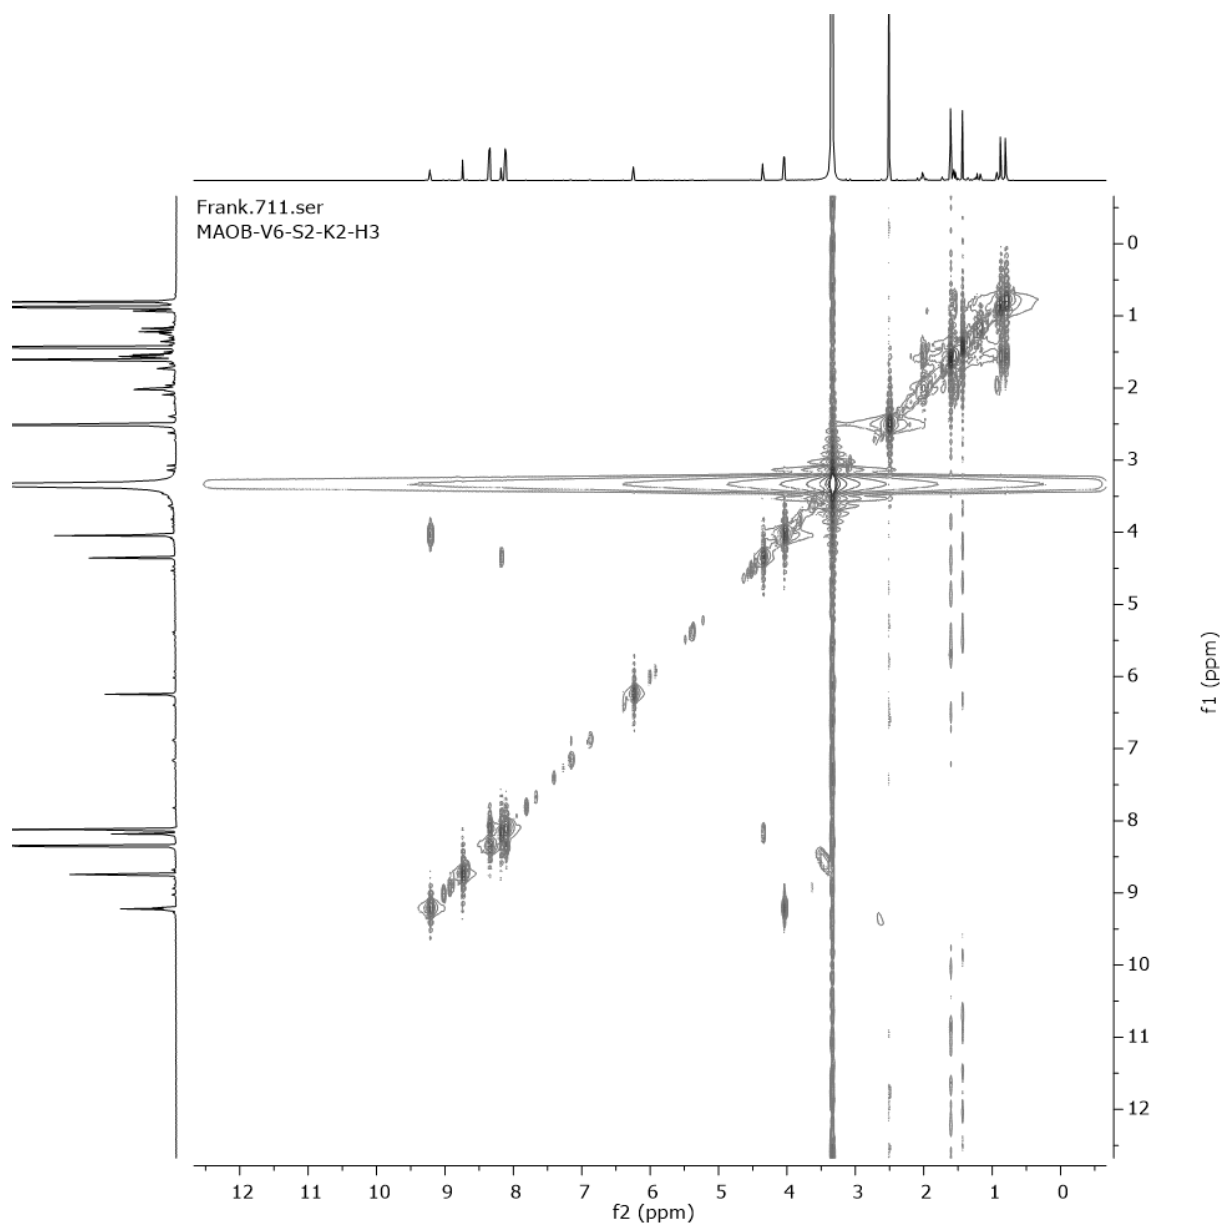

Figure S6. HSQC (600MHz/150 MHz, DMSO- $d_6$ ) spectrum of compound **1**.

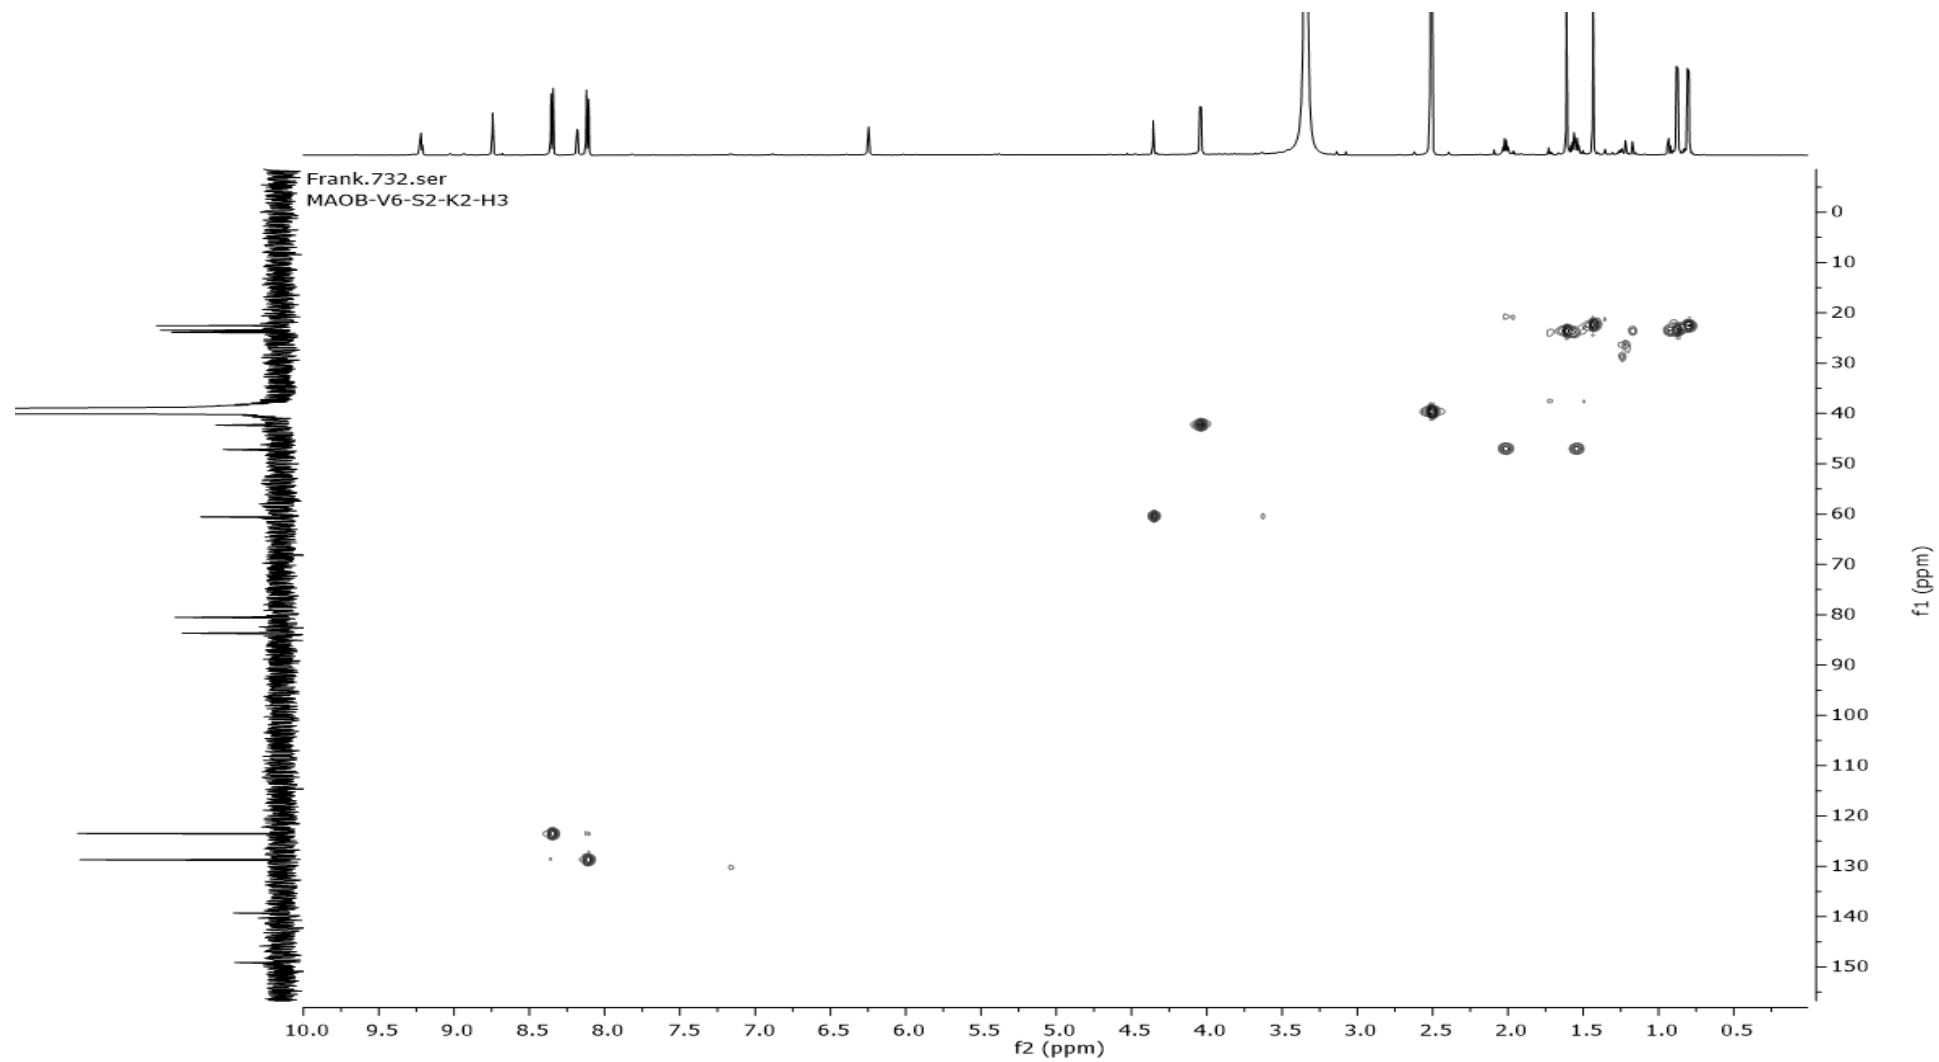

Figure S7. HMBC (600MHz/150 MHz, DMSO-*d*<sub>6</sub>) spectrum of compound **1**.

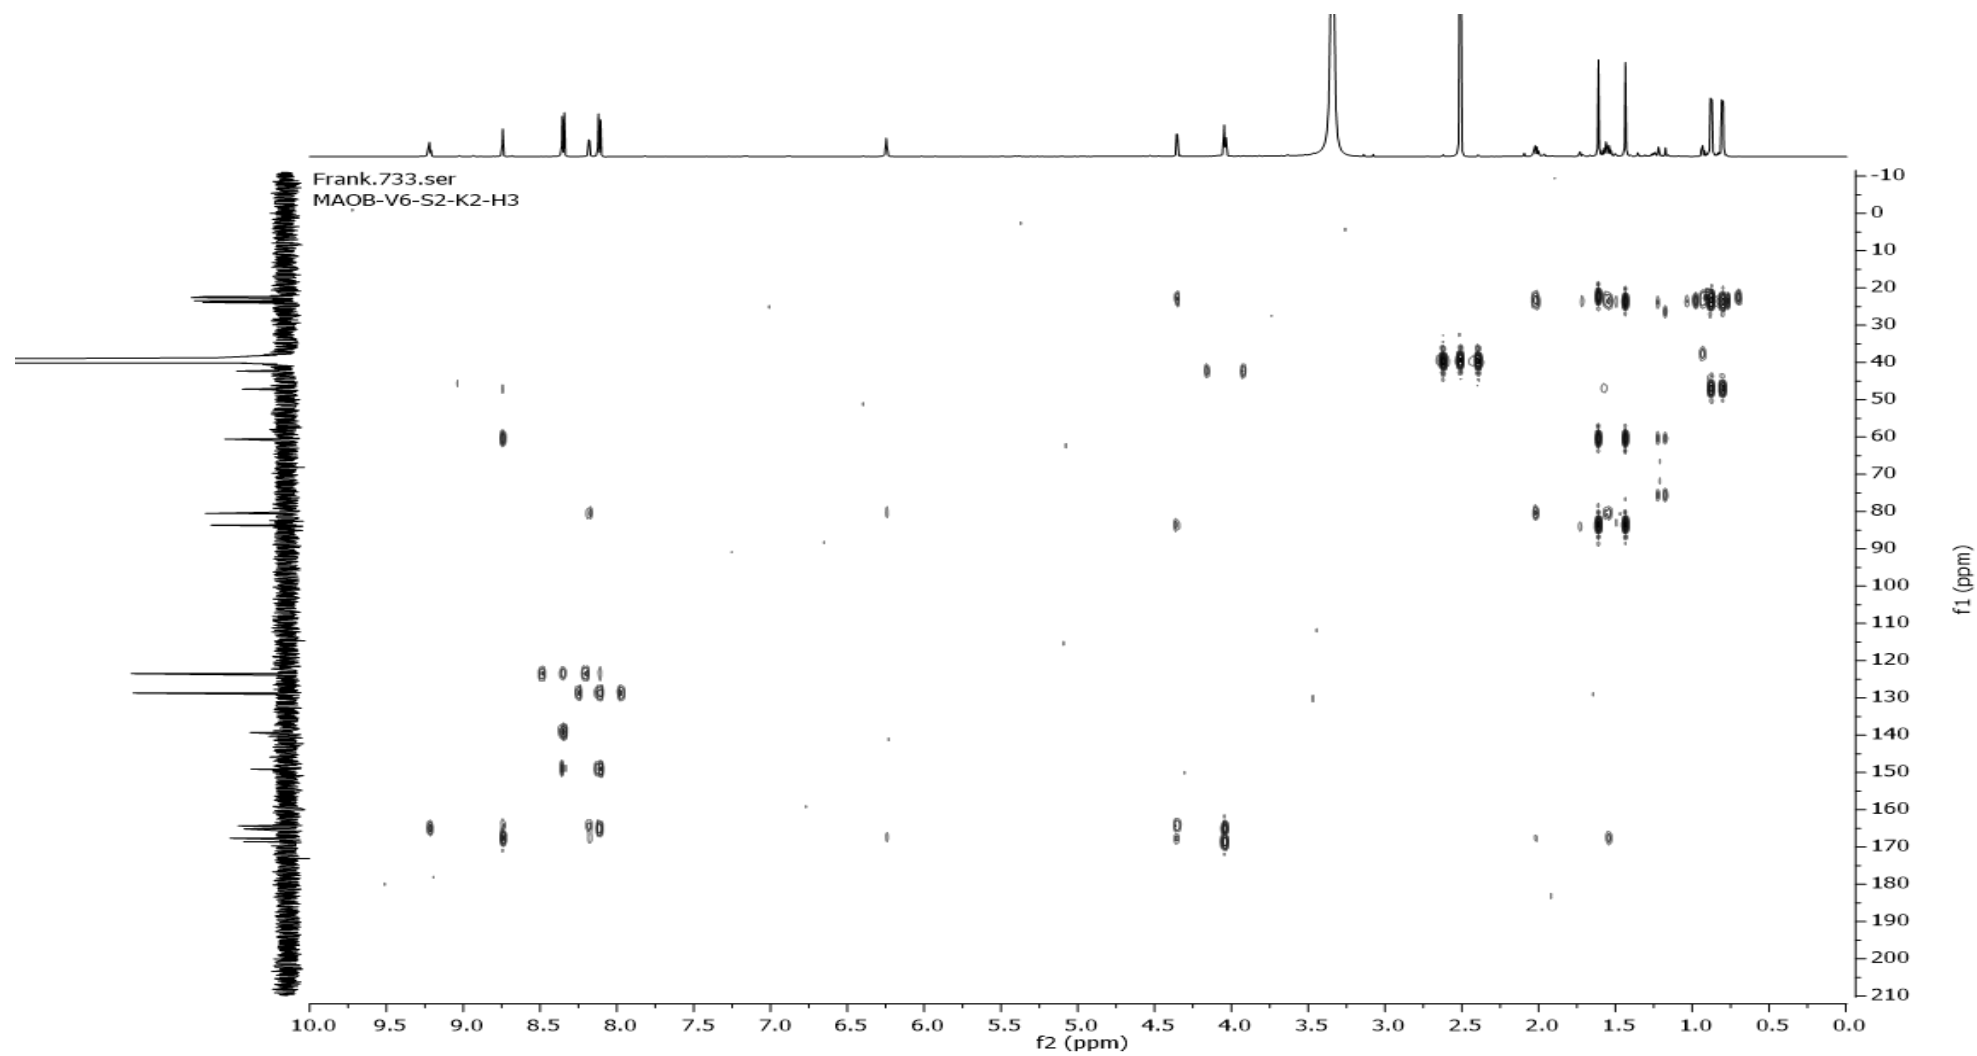



Figure S8. ROESY (600MHz, DMSO-*d*<sub>6</sub>) spectrum of compound **1**.

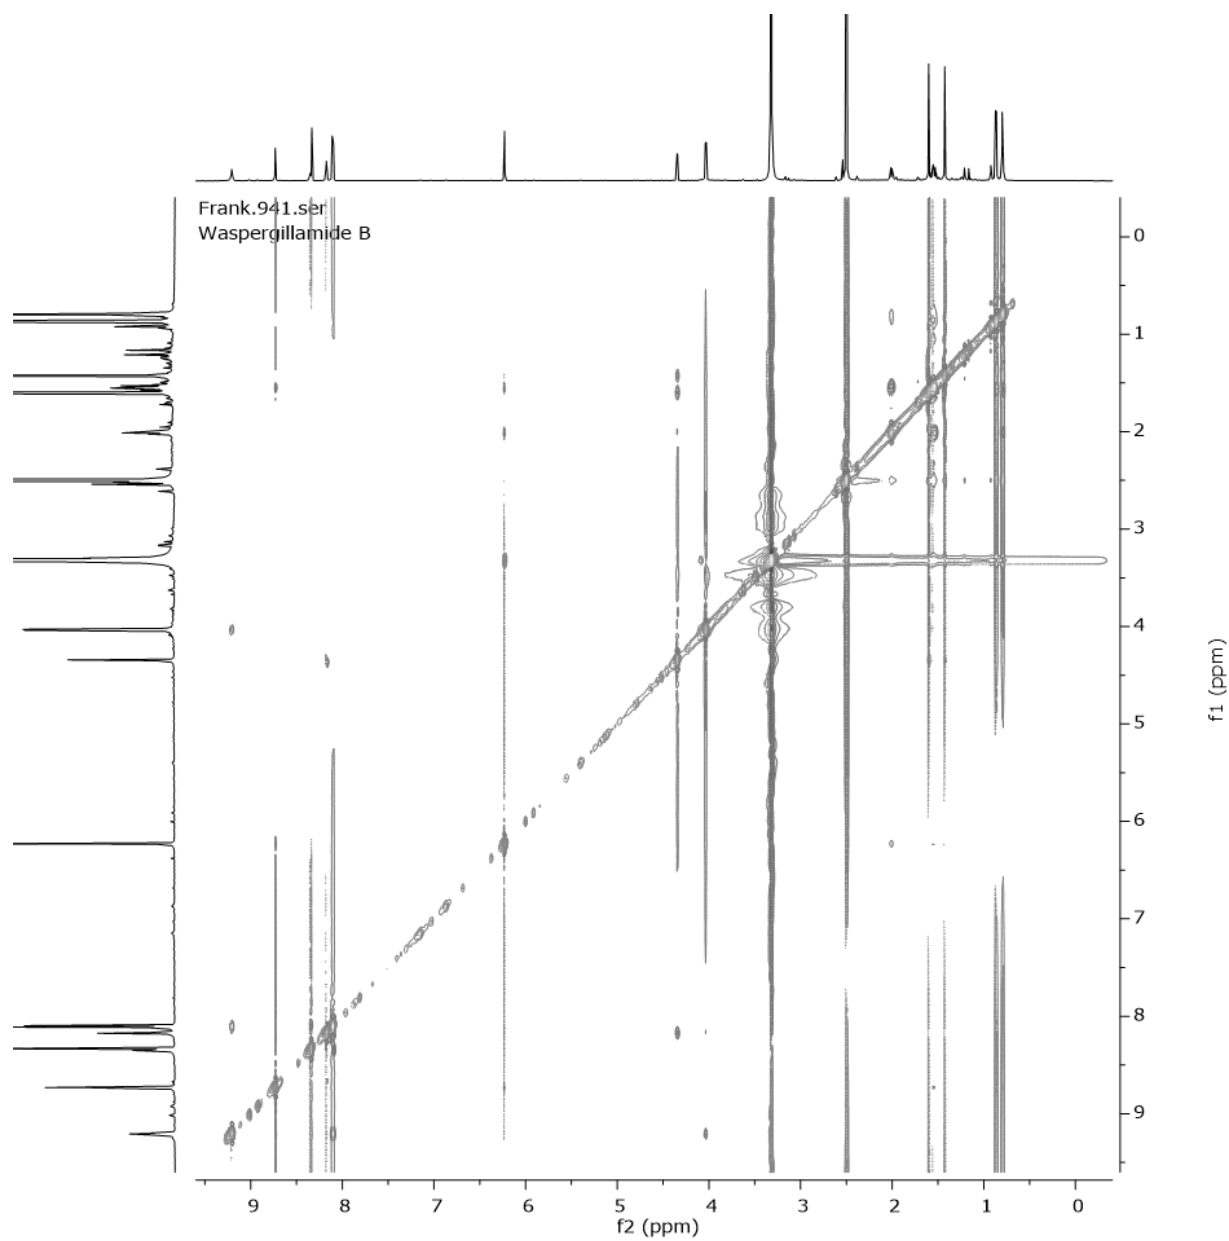

Figure S9. UV spectrum of compound 2.

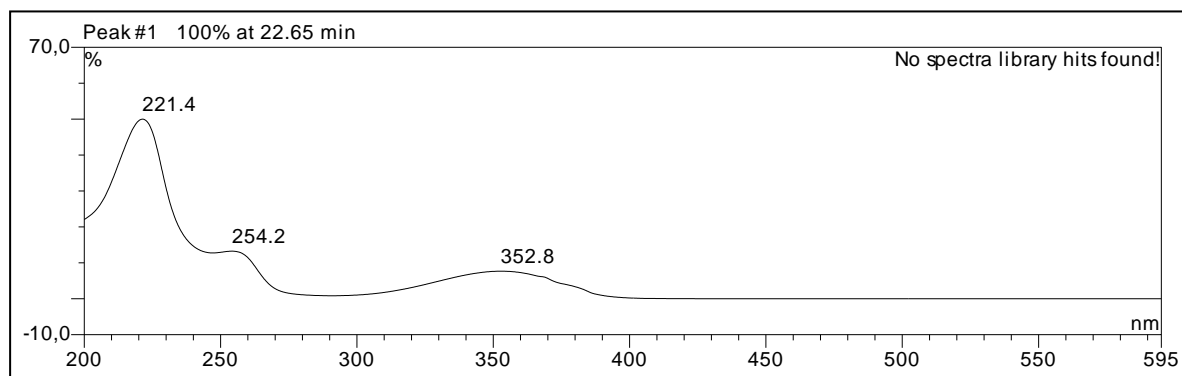

Figure S10. HRESIMS of compound 2.

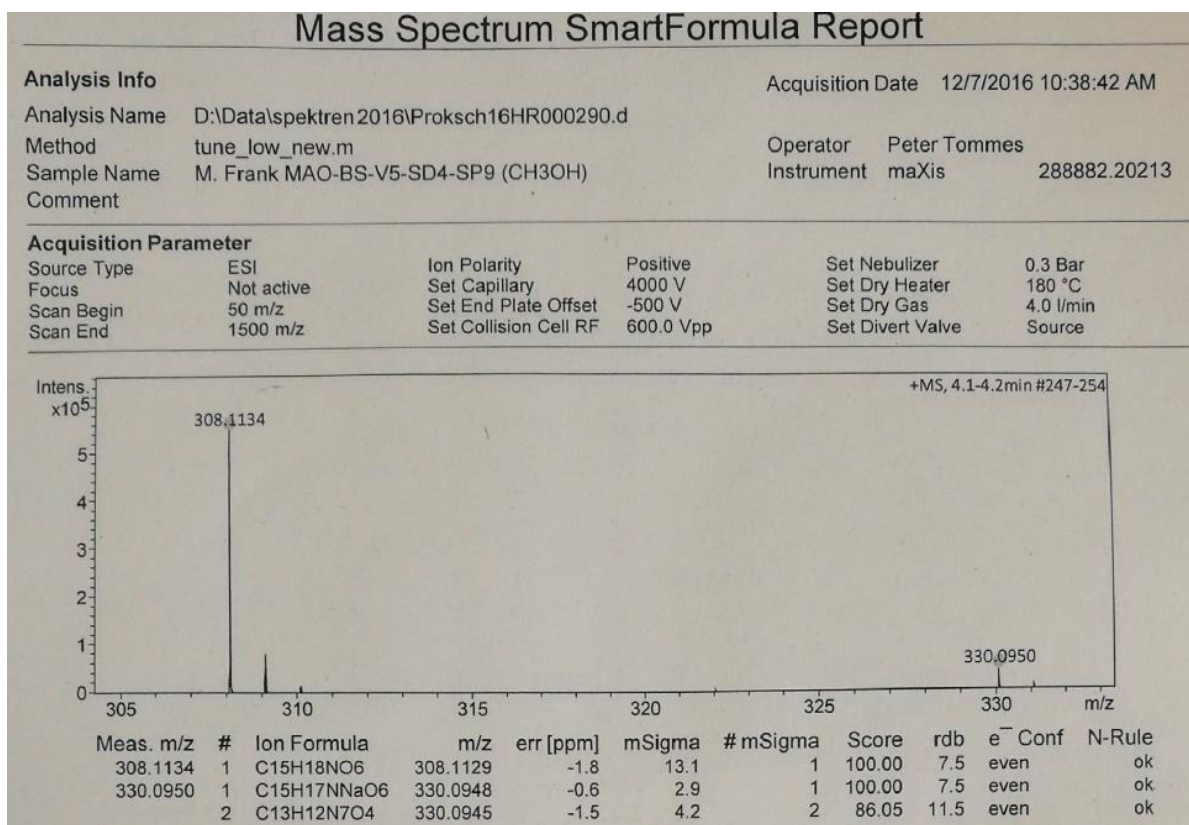

Figure S11.  $^1\text{H}$  NMR (600 MHz,  $\text{MeOH-}d_4$ ) spectrum of compound **2**.

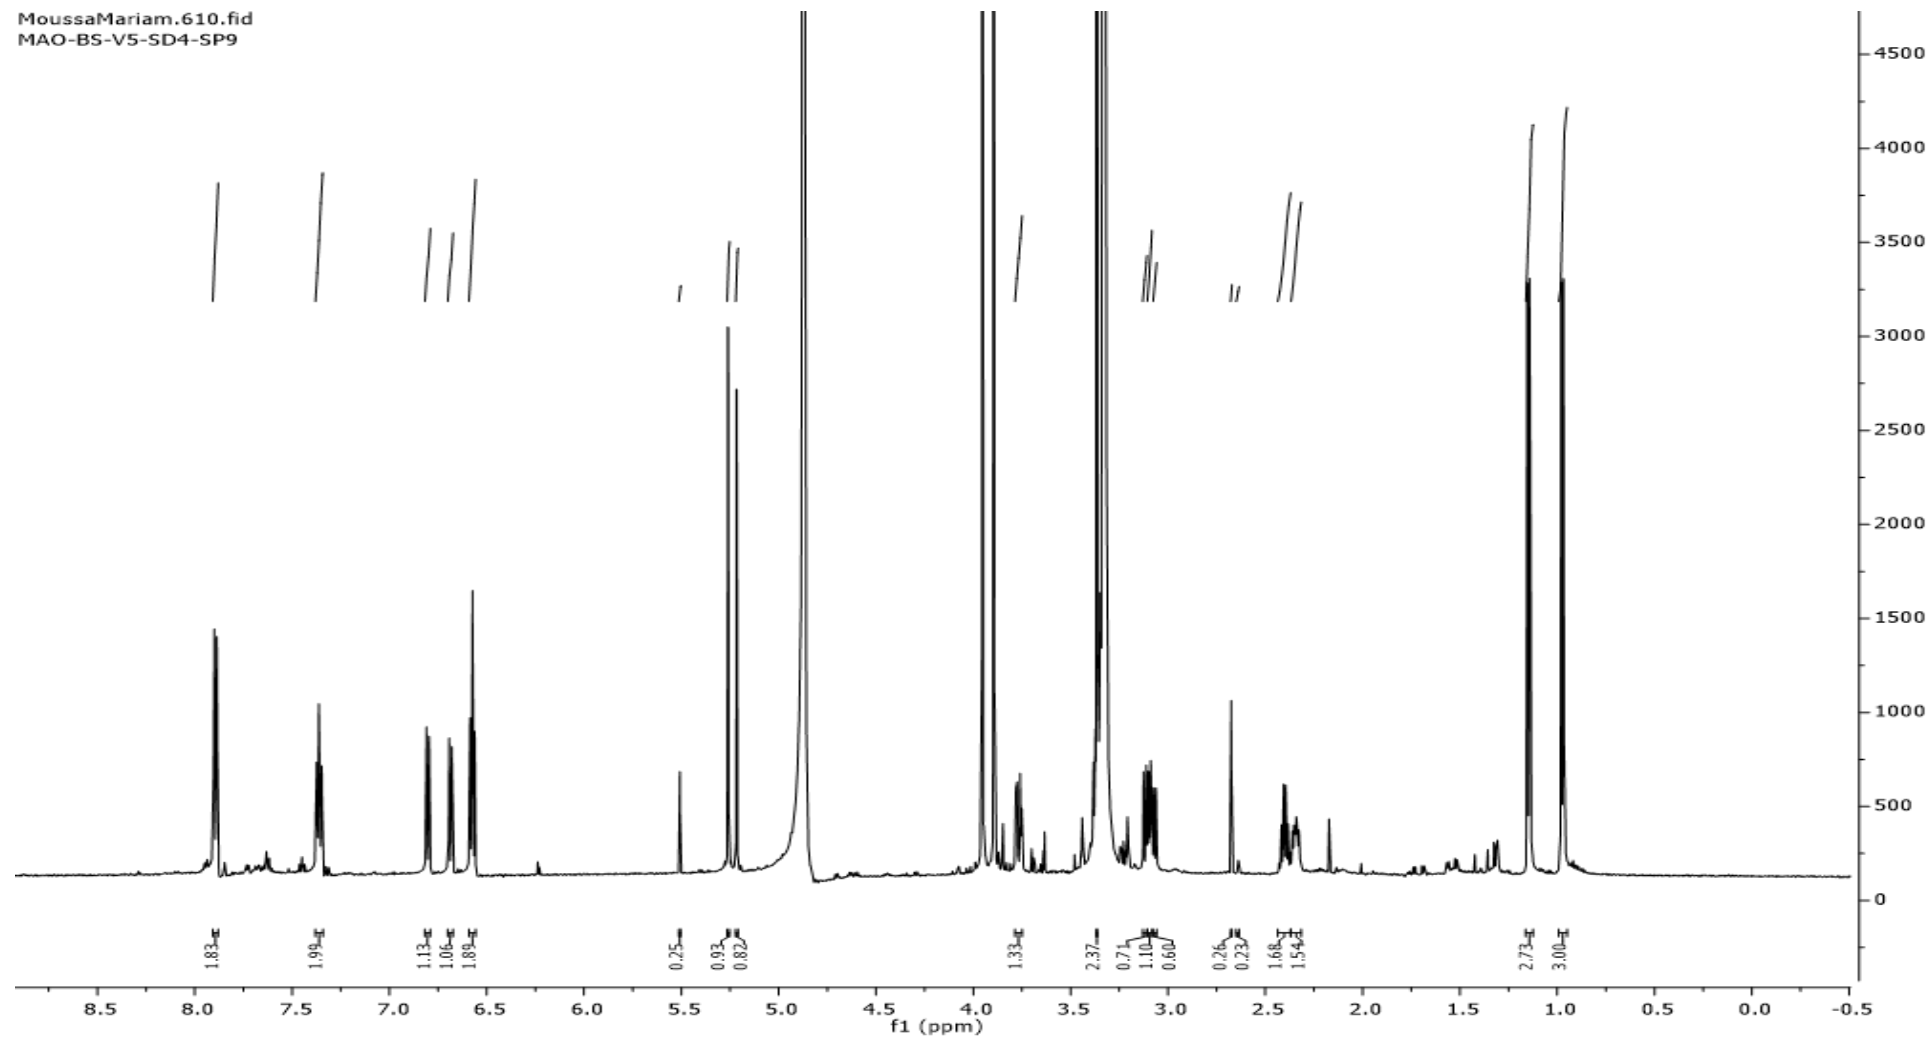

Figure S12. COSY (600 MHz, MeOH-*d*<sub>4</sub>) spectrum of compound **2**.

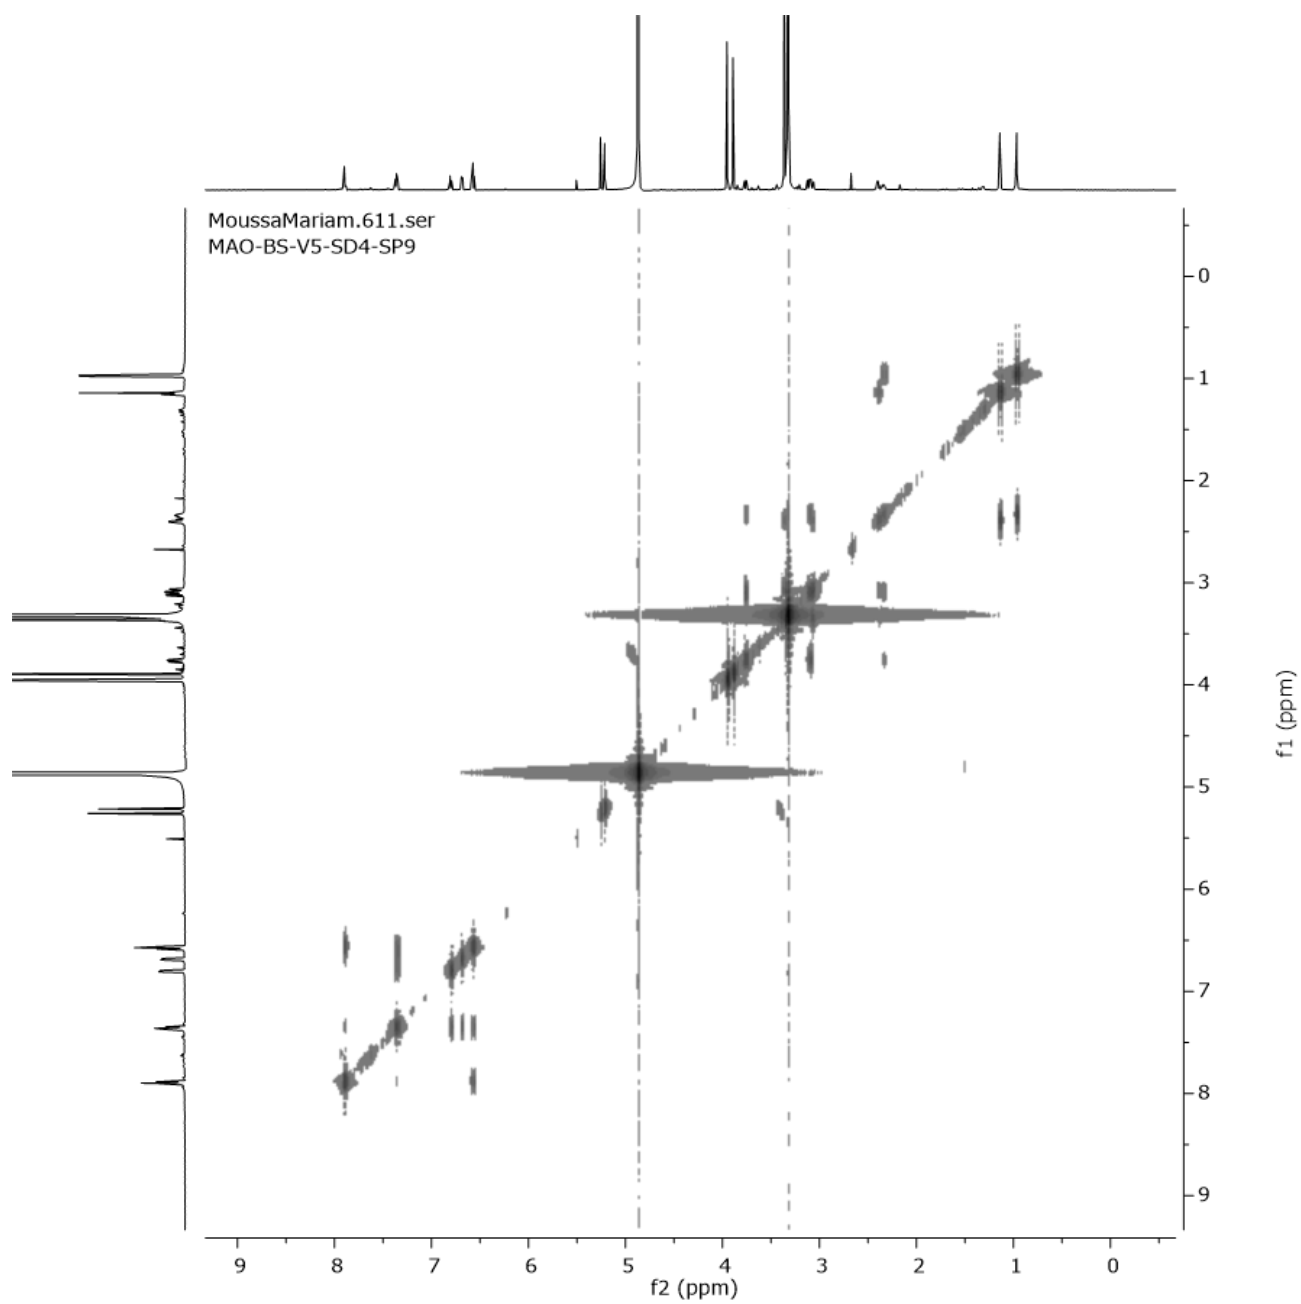

Figure S13. HSQC (600MHz/150 MHz, MeOH-*d*<sub>4</sub>) spectrum of compound **2**.

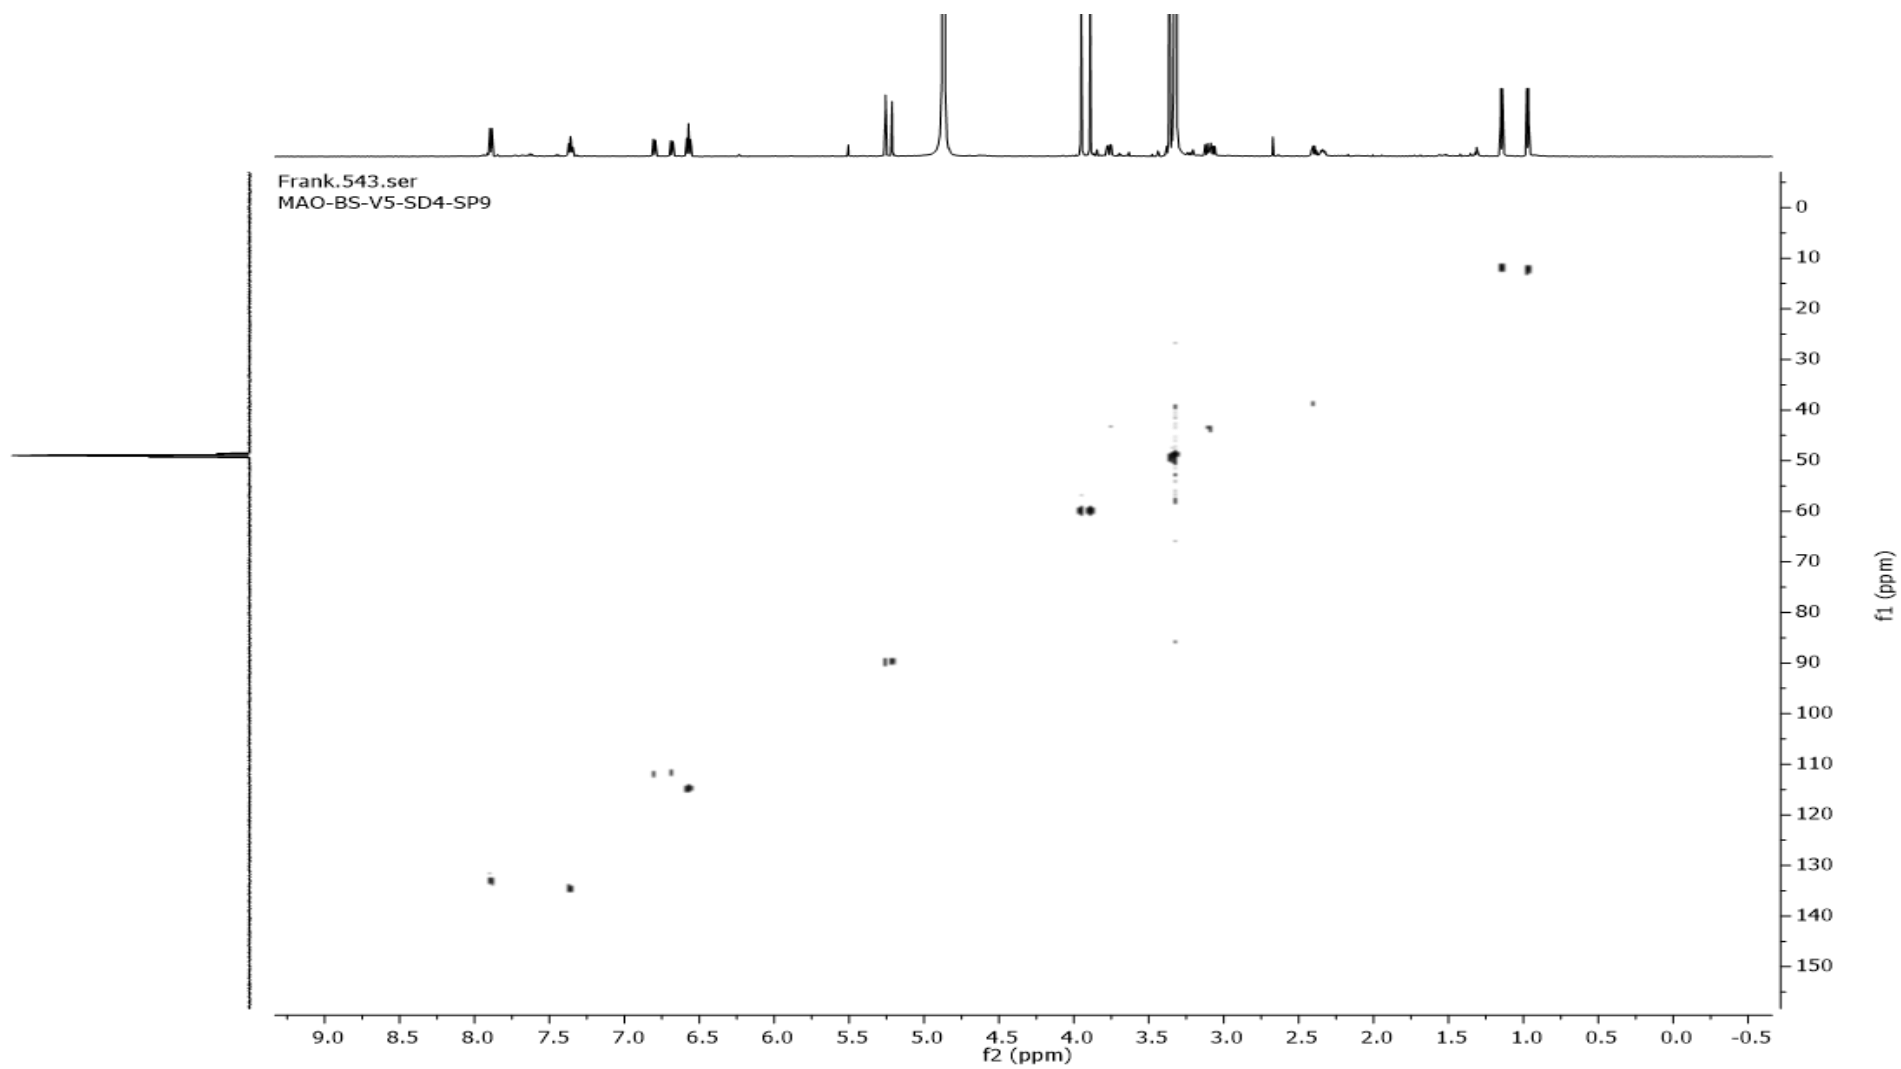

Figure S14. HMBC (600MHz/150 MHz, MeOH- $d_4$ ) spectrum of compound **2**.

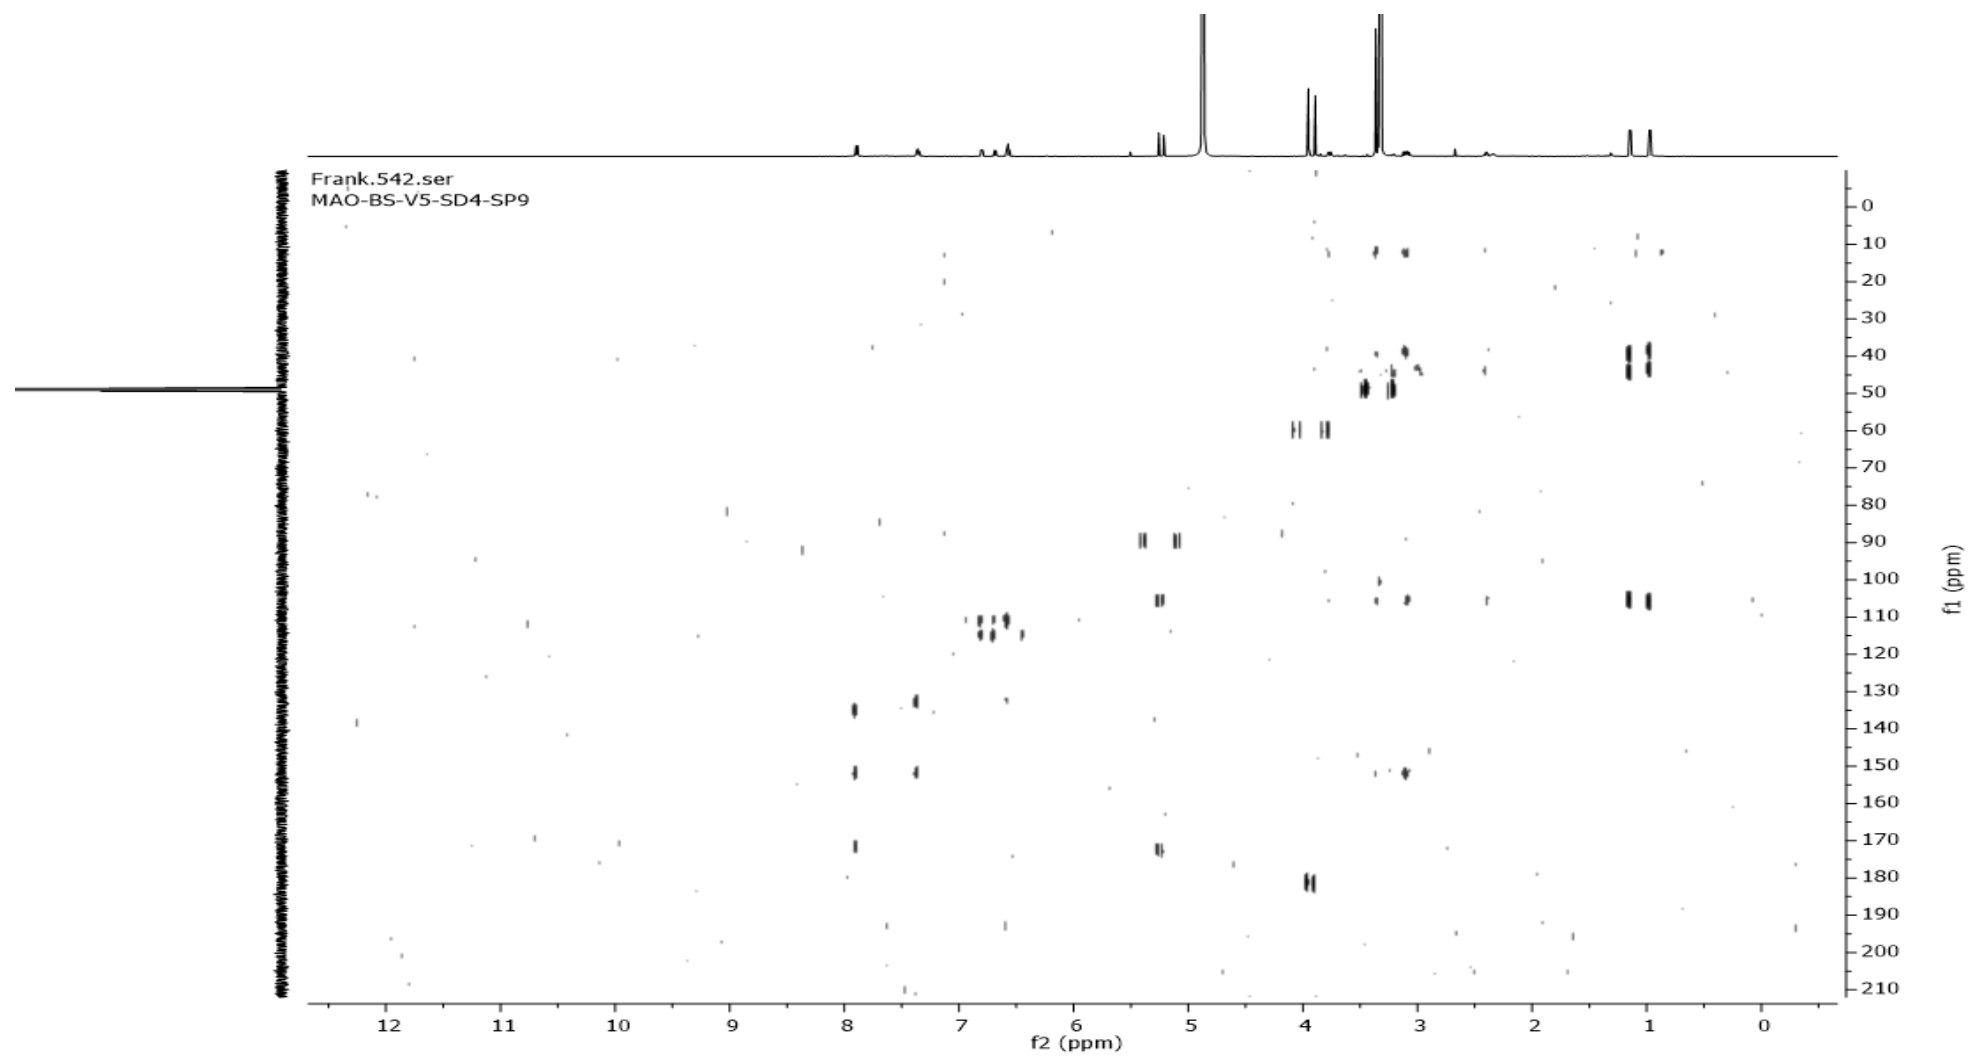

Figure S15. UV spectrum of compound **3**.

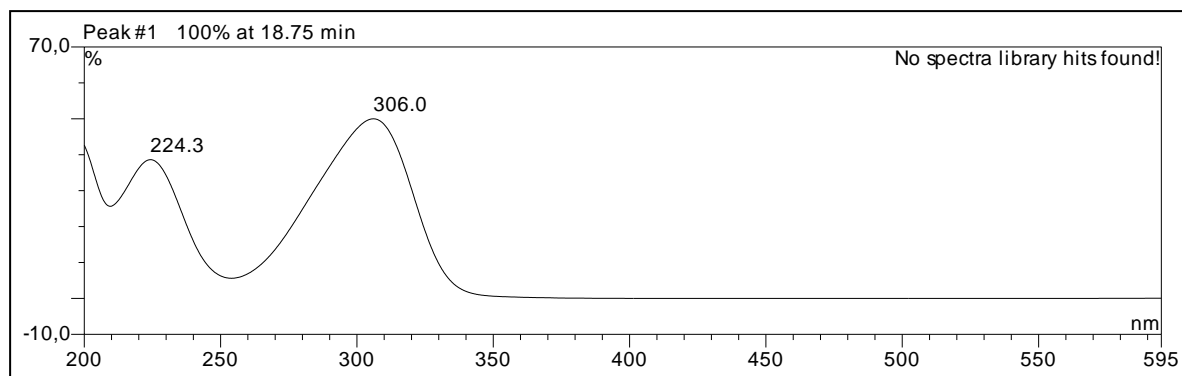

Figure S16. HRESIMS of compound **3**.

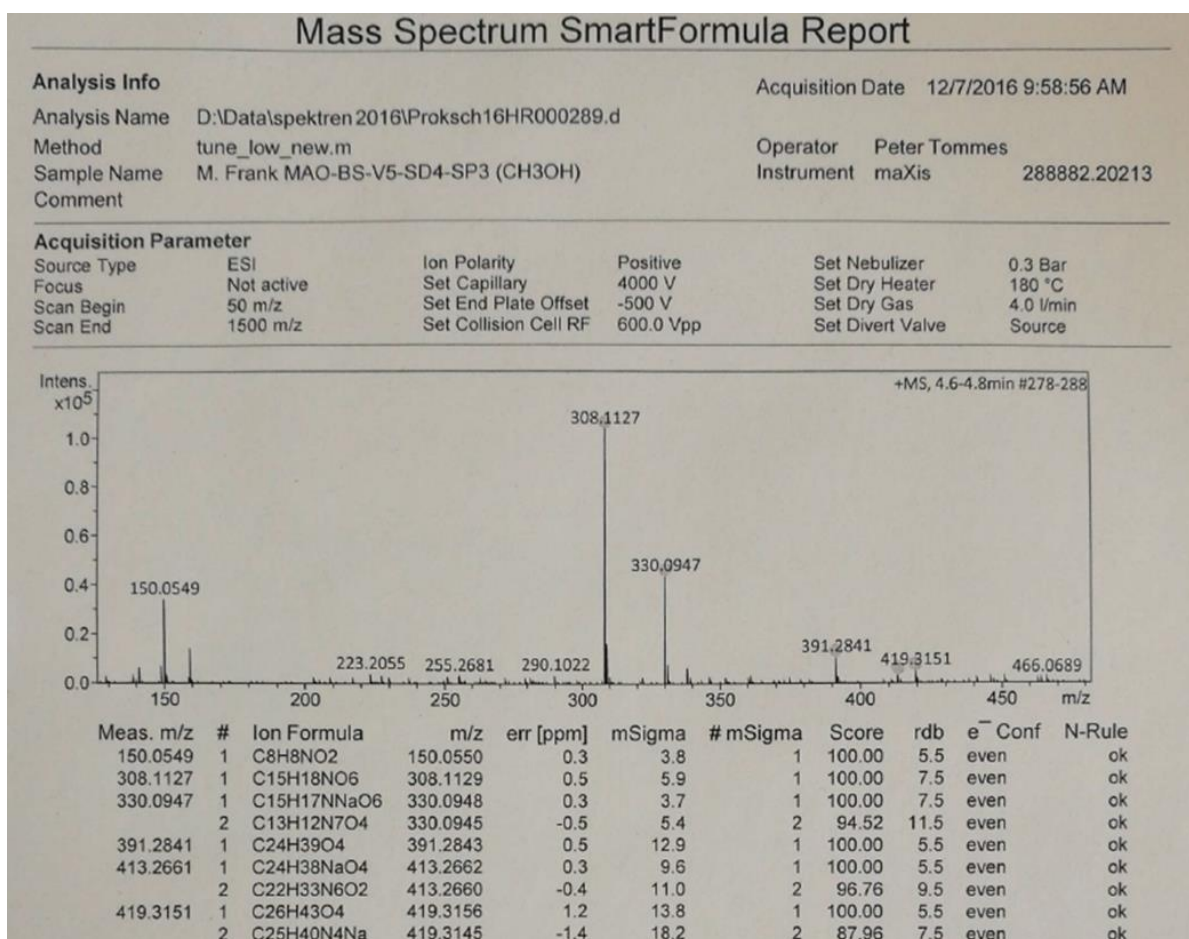

Figure S17.  $^1\text{H}$  NMR (600 MHz,  $\text{MeOH-}d_4$ ) spectrum of compound **3**.

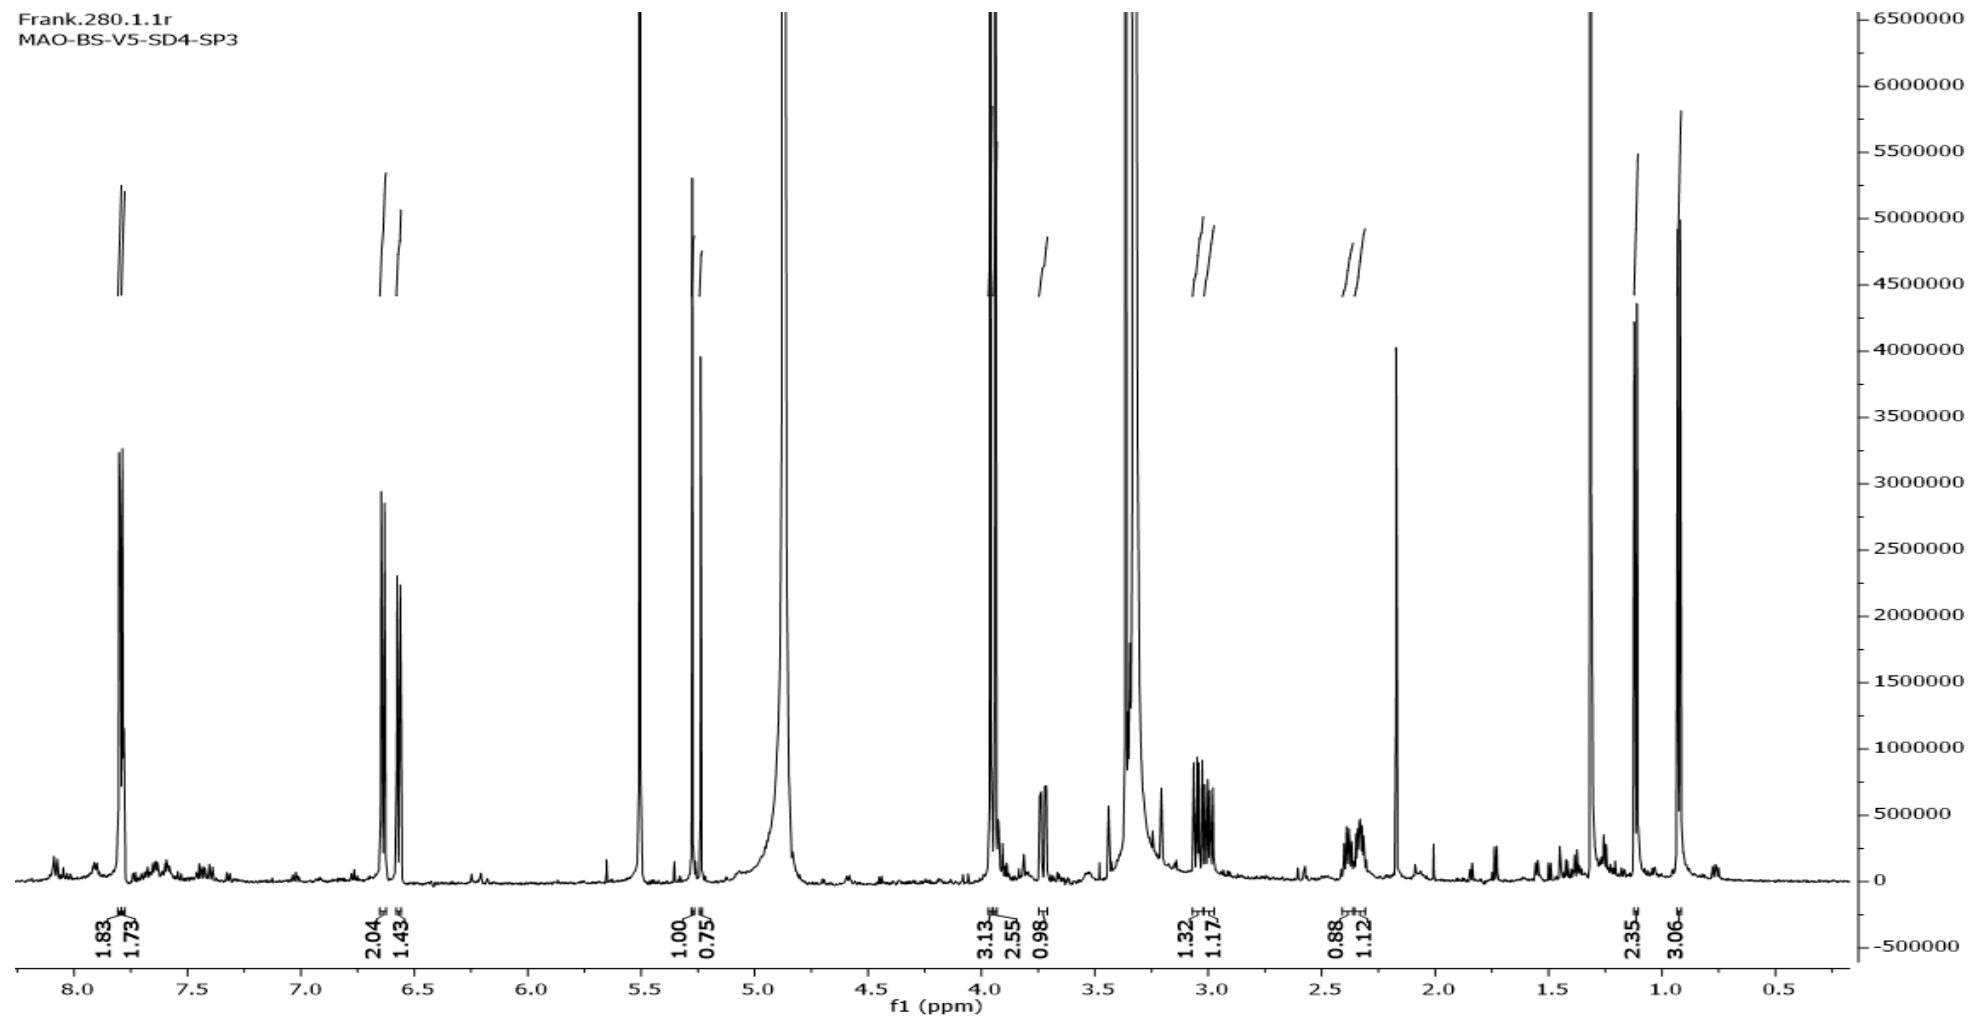



Figure S18. COSY (600 MHz, MeOH- $d_4$ ) spectrum of compound **3**.

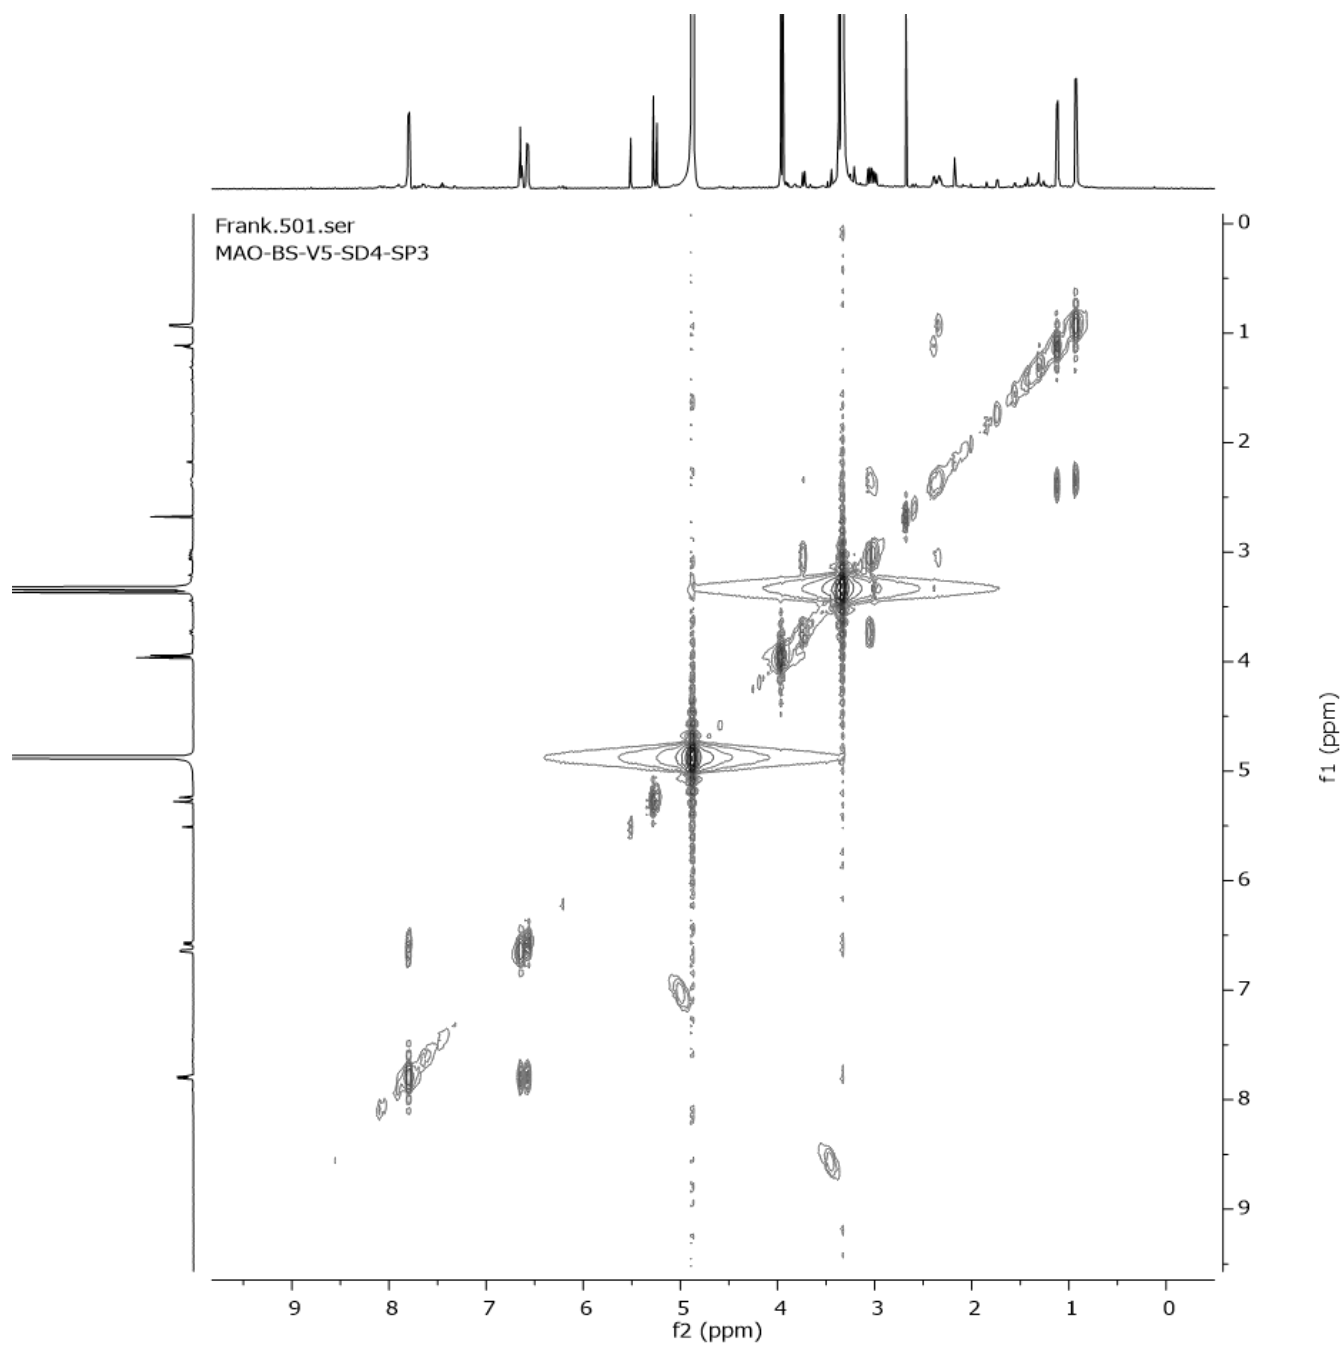

Figure S19. HSQC (600MHz/150 MHz, MeOH-*d*<sub>4</sub>) spectrum of compound **3**.

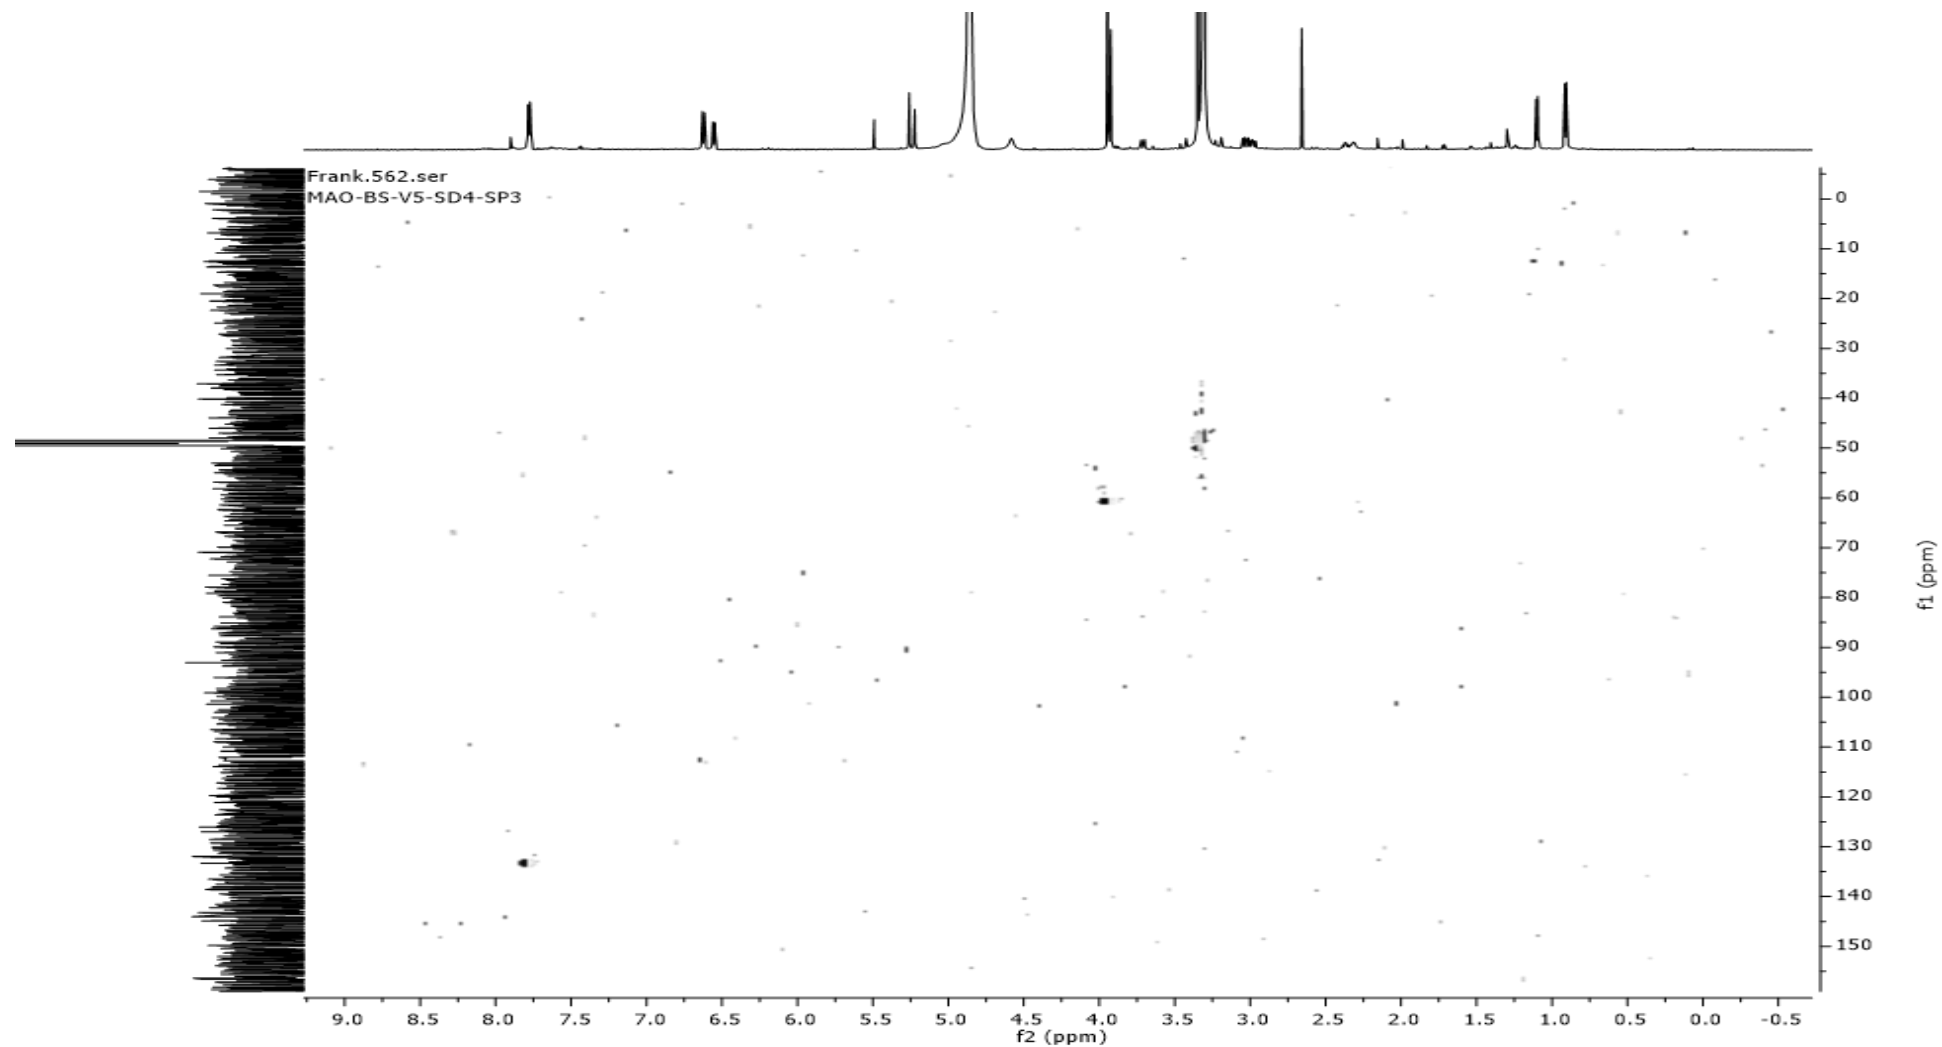

Figure S20. HMBC (600MHz/150 MHz, MeOH- $d_4$ ) spectrum of compound **3**.

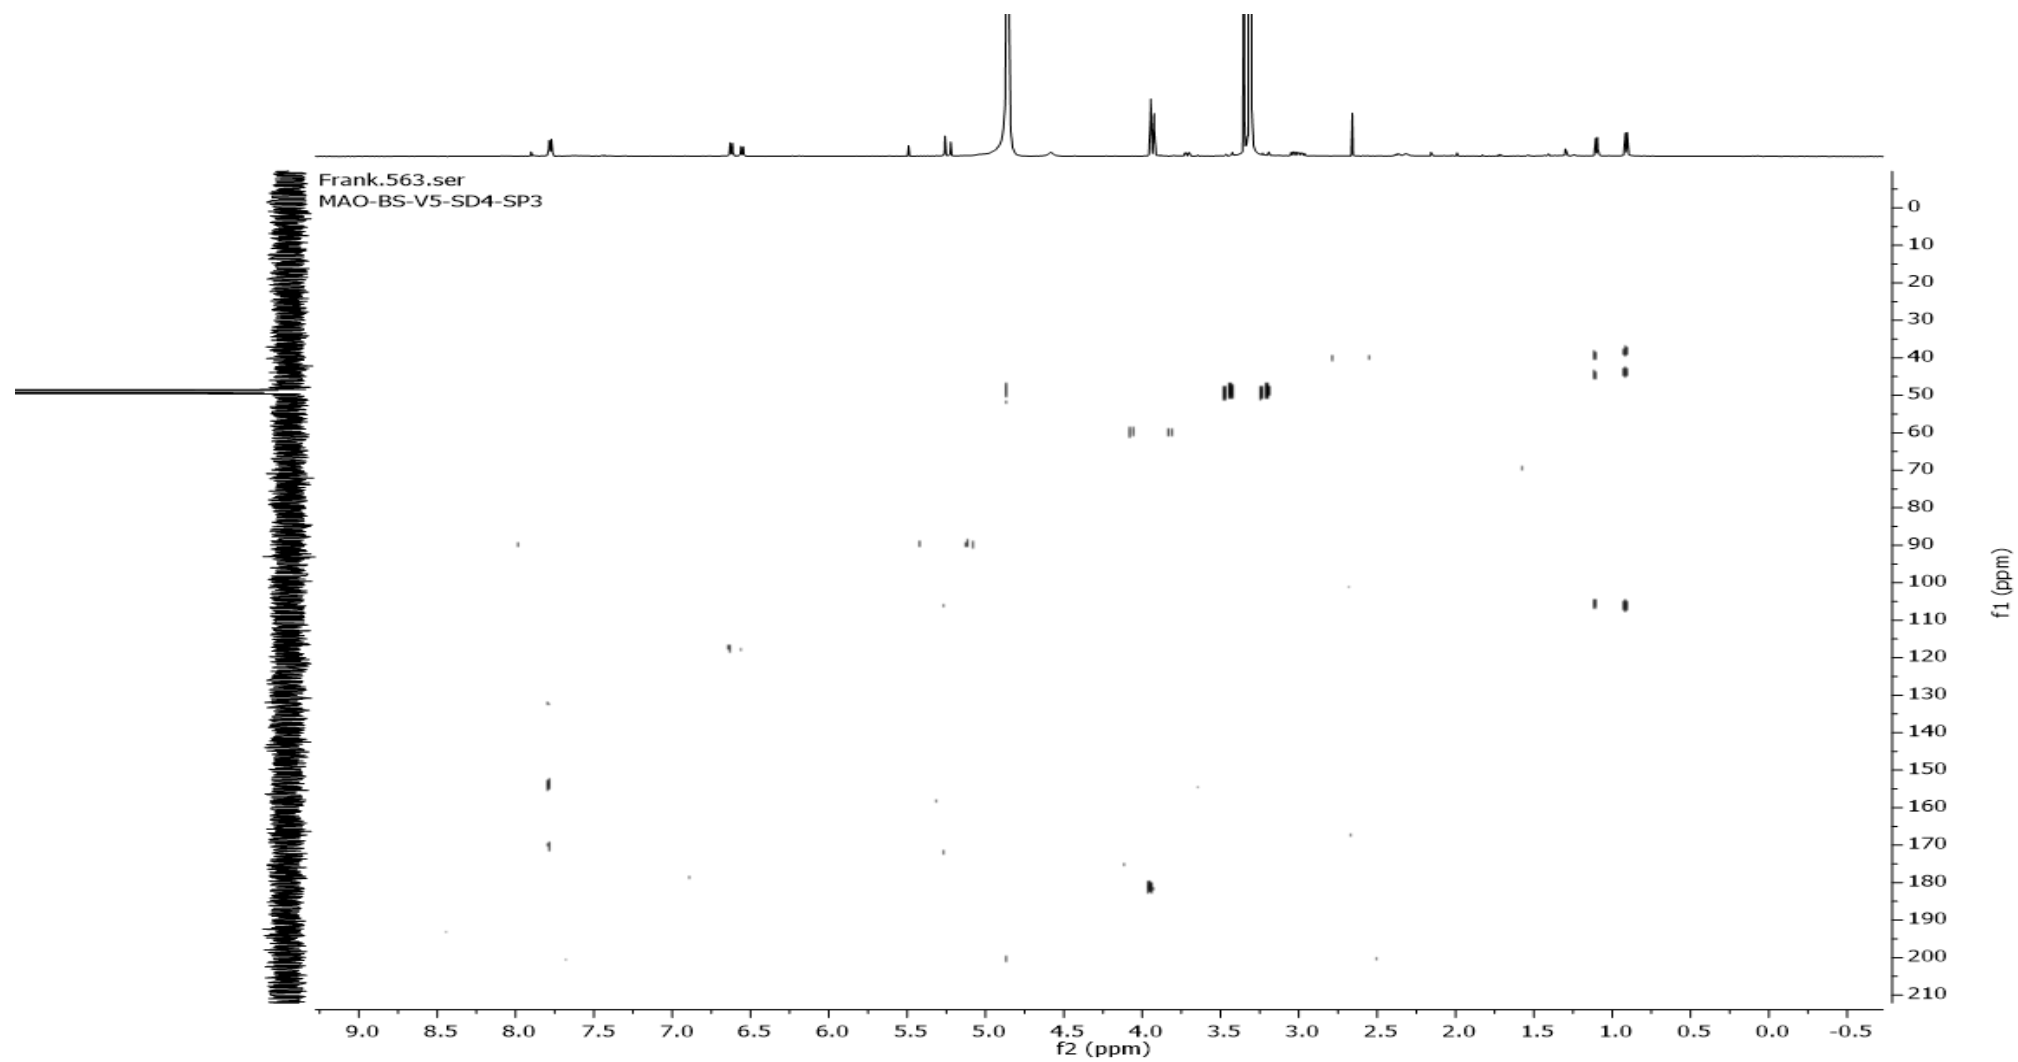

Figure S21. Chromatogram of C<sub>4</sub>-Marfey's L-FDAA adduct of compound **1**.

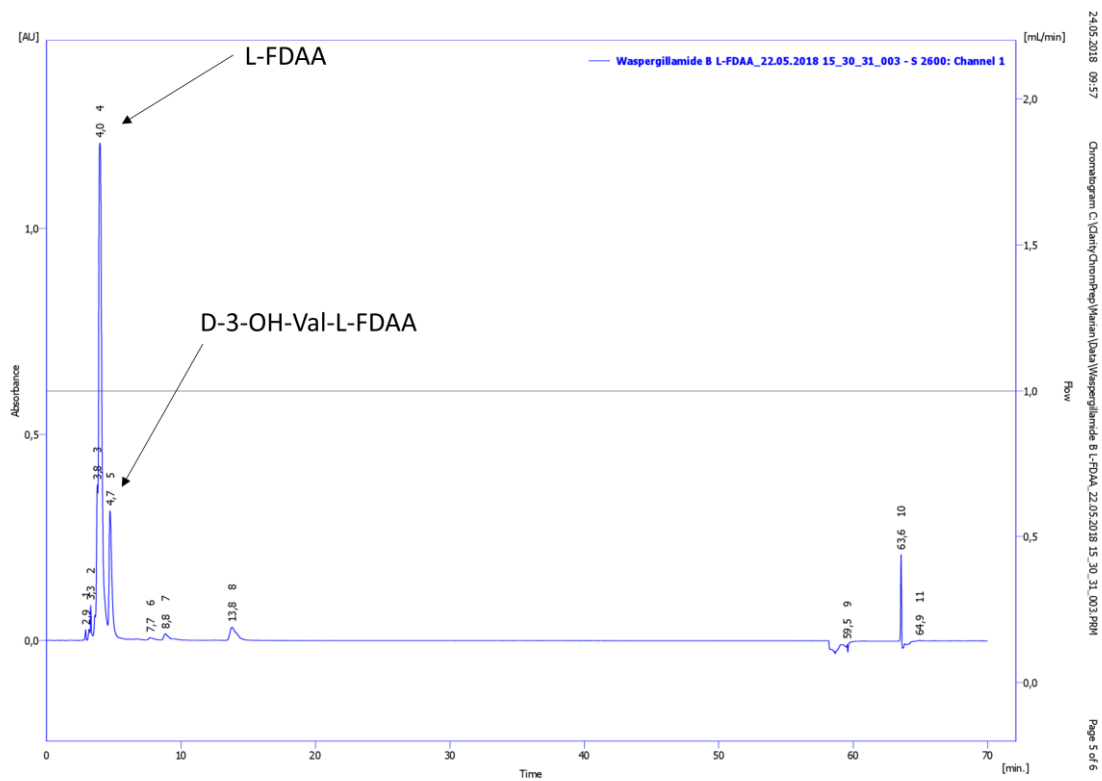

Figure S22. Chromatogram of C<sub>4</sub>-Marfey's D-FDAA adduct of compound **1**.

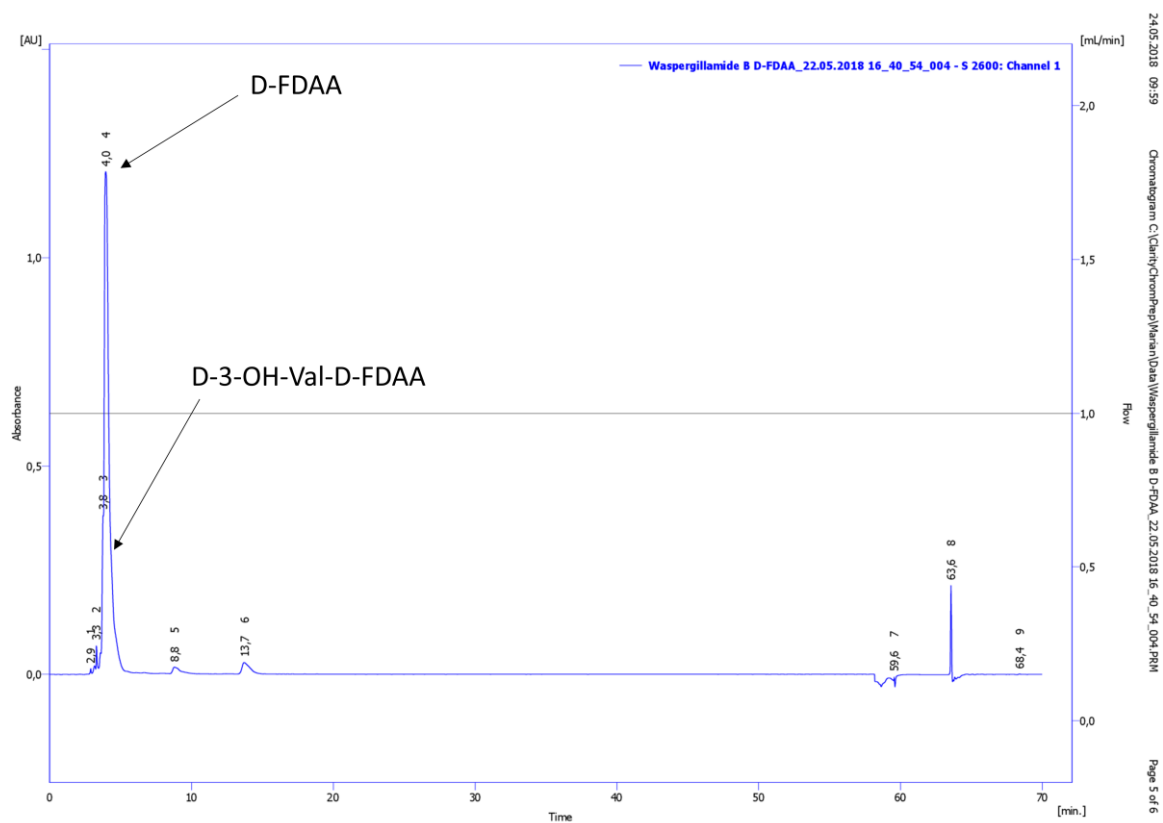

Supplement: s001 [file marinedrugs-17-00099-s001.pdf]
